# Supplementary material for: Reliability of Early Estimates of the Basic Reproduction Number of COVID-19: A Systematic Review and Meta-Analysis
Source: MDPI journal article supplement (doi:10.3390/ijerph191811613), 2022-09-15
Supplement: s1 [file s1]

## Data extraction form

|                                             |  |
|---------------------------------------------|--|
| Study ID ( <i>study number eg. 1, 2..</i> ) |  |
|---------------------------------------------|--|

## General information

|                                           |  |
|-------------------------------------------|--|
| Date form completed ( <i>dd/mm/yyyy</i> ) |  |
| Name of person extracting data            |  |
| Notes:                                    |  |

## Study details

|                                                  |  |
|--------------------------------------------------|--|
| Study title                                      |  |
| DOI                                              |  |
| Journal                                          |  |
| Author                                           |  |
| Affiliation of author                            |  |
| Date of publication ( <i>year, month, date</i> ) |  |

## Characteristics of included studies

### Methods

|                                                            | Descriptions as stated in report/paper | Location in text or source ( <i>pg &amp; ¶/fig/table/other</i> ) |
|------------------------------------------------------------|----------------------------------------|------------------------------------------------------------------|
| Country                                                    |                                        |                                                                  |
| City                                                       |                                        |                                                                  |
| Data collected from date ( <i>year, month, date</i> )      |                                        |                                                                  |
| Data collected until the date ( <i>year, month, date</i> ) |                                        |                                                                  |
| Method used to calculate reproduction number               |                                        |                                                                  |
| Model used to calculate reproduction number                |                                        |                                                                  |
| Assumption of the model                                    |                                        |                                                                  |
| Sample size                                                |                                        |                                                                  |
| Notes:                                                     |                                        |                                                                  |

**Outcome: Reproduction number**

|                                                                        | Description | Location in text or source ( <i>pg &amp; ¶/fig/table/other</i> ) |
|------------------------------------------------------------------------|-------------|------------------------------------------------------------------|
| Type of reproduction number assessed                                   |             |                                                                  |
| Reproduction number                                                    |             |                                                                  |
| Interval of reproduction number                                        |             |                                                                  |
| SD or SE ( <i>if mentioned</i> )                                       |             |                                                                  |
| Type of interval ( <i>95% CI, 90% CI, max/min, Credible Interval</i> ) |             |                                                                  |
| Type of central estimate ( <i>mean, median</i> )                       |             |                                                                  |
| Notes:                                                                 |             |                                                                  |

**Study quality assessment through National Institute of Health (NIH) quality assessment tool for case series studies**

| Criteria                                                                                                                   | Yes                      | No                       | Other<br>(CD, NR,<br>NA)* |
|----------------------------------------------------------------------------------------------------------------------------|--------------------------|--------------------------|---------------------------|
| 1. Was the study question or objective clearly stated?                                                                     | <input type="checkbox"/> | <input type="checkbox"/> |                           |
| 2. Was the study population clearly and fully described, including a case definition?                                      | <input type="checkbox"/> | <input type="checkbox"/> |                           |
| 3. Were the cases consecutive?                                                                                             | <input type="checkbox"/> | <input type="checkbox"/> |                           |
| 4. Were the subjects comparable?                                                                                           | <input type="checkbox"/> | <input type="checkbox"/> |                           |
| 5. Was the intervention clearly described?                                                                                 | <input type="checkbox"/> | <input type="checkbox"/> |                           |
| 6. Were the outcome measures clearly defined, valid, reliable, and implemented consistently across all study participants? | <input type="checkbox"/> | <input type="checkbox"/> |                           |
| 7. Was the length of follow-up adequate?                                                                                   | <input type="checkbox"/> | <input type="checkbox"/> |                           |
| 8. Were the statistical methods well-described?                                                                            | <input type="checkbox"/> | <input type="checkbox"/> |                           |
| 9. Were the results well-described?                                                                                        | <input type="checkbox"/> | <input type="checkbox"/> |                           |

|                                                  |
|--------------------------------------------------|
| Quality Rating (Good, Fair, or Poor)             |
| Additional Comments (If POOR, please state why): |

\*CD, cannot determine; NA, not applicable; NR, not reported
