# Supplementary material for: Reliability of Early Estimates of the Basic Reproduction Number of COVID-19: A Systematic Review and Meta-Analysis
Source: Int J Environ Res Public Health. 2022 Sep 15;19(18):11613. doi: 10.3390/ijerph191811613 (PMC9517346; doi:10.3390/ijerph191811613)
Supplement: Supplementary file 1 [file ijerph-19-11613-s001.zip › table S1_ro_meta.xlsx]

## Sheet: Sheet1
studyCount	study	author	authorAffiliation	title	journal	dateOfPublication	country	city	china	continent	from	to	duration_cat	methodCat	intervalType	meanMedian	ro	roFrom	roTo	Clarityinobjectiveclearly	Studypopulationclearlyandful	Thecasesconsecutive	Thesubjectscomparable	Theinterventionclearlydescrib	Theoutcomemeasuresclearlydef	Thelengthoffollowupadequate	Thestatisticalmethodswelldes	Theresultswelldescribed	totalScore
1	1	Ling Xue et al.	China, Australia, Mexico, USA, Canada	A data-driven network model for the emerging COVID-19 epidemics in Wuhan, Toronto and Italy	Mathematical Biosciences	2020-06-01	Canada	Toronto		North America	2020-01-26	2020-03-18	1-2 months	Compartmental Model	95% Confidence Interval	Mean	0.6416	0.4716	0.8116	y	y	y	y	NA	y	y	y	y	8
1	1	Ling Xue et al.	China, Australia, Mexico, USA, Canada	A data-driven network model for the emerging COVID-19 epidemics in Wuhan, Toronto and Italy	Mathematical Biosciences	2020-06-01	China	Wuhan	Wuhan	Asia	2020-01-11	2020-01-23	<= 2 weeks	Compartmental Model	95% Confidence Interval	Mean	3.4074	2.9959	3.8188	y	y	y	y	NA	y	y	y	y	8
1	1	Ling Xue et al.	China, Australia, Mexico, USA, Canada	A data-driven network model for the emerging COVID-19 epidemics in Wuhan, Toronto and Italy	Mathematical Biosciences	2020-06-01	Italy		Overall	Europe	2020-01-31	2020-03-08	1-2 months	Compartmental Model	95% Confidence Interval	Mean	1.4763	1.2834	1.6691	y	y	y	y	NA	y	y	y	y	8
2	2	Kentaro Iwata	Japan	A Simulation on Potential Secondary Spread of Novel Coronavirus in an Exported Country Using a Stochastic Epidemic SEIR Model	Journal of Clinical Medicine	2020-03-30	Outside China		Overall					Compartmental Model	Inter quartile range	Mean	6.5	5.6	7.2	y	y	N	y	NA	y	NR	y	y	6
3	3	Semu M. Kassa et al.	Botswana and South Africa	Analysis of the mitigation strategies for COVID-19: From mathematical modelling perspective	Chaos, Solitons and Fractals	2020-06-05	China	Hubei	Hubei	Asia	2020-01-01	2020-03-17	> 2 months	Compartmental Model	Lower quartile, Upper quartile	Median	2.9	2	4	y	y	y	y	NA	y	y	y	y	8
4	4	Xiaoli Wang et al.	China	Basic epidemiological parameter values from data of real-world in mega-cities: the characteristics of COVID-19 in Beijing, China	BMC Infectious Diseases	2020-07-20	China	Beijing	Outside Hubei	Asia	2020-01-01	2020-04-03	> 2 months	Others	95% Confidence Interval	Not specified	2	1.6	2.4	y	y	y	y	NA	y	y	y	y	8
5	5	Max S. Y. Lau et al.	USA	Characterizing superspreading events and age-specific infectiousness of SARS-CoV-2 transmission in Georgia, USA	PNAS	2020-09-08	USA	Georgia		North America	2020-03-01	2020-05-03	> 2 months	Compartmental Model	95% Confidence Interval	Median	3.3	2.4	5.2	y	y	y	y	NA	y	y	y	y	8
6	6	Sudhanshu Kumar Biswas et al.	India	COVID-19 pandemic in India: a mathematical model study	Nonlinear Dynamics	2020-09-21	India		Overall	Asia	2020-03-01	2020-04-24	1-2 months	Compartmental Model	Lower, Upper values	Not specified	2.09574	1.99027	2.20056	y	y	y	y	NA	y	y	y	N	7
7	7	Greg Dropkin	UK	COVID-19 UK Lockdown Forecasts and R0	MedRxiv	2020-04-10	UK		Overall	Europe	2020-01-31	2020-03-31	1-2 months	Compartmental Model	90% Credible Interval	Not specified	5.81	5.08	6.98	y	y	y	y	y	N	y	y	y	8
7	7	Greg Dropkin	UK	COVID-19 UK Lockdown Forecasts and R0	Frontiers in Public Health	2020-05-29	UK		Overall	Europe	2020-01-31	2020-03-31	1-2 months	Compartmental Model	95% Credible Interval	Not specified	6.71	6.43	7	y	y	y	y	y	N	y	y	y	8
7	7	Greg Dropkin	UK	COVID-19 UK Lockdown Forecasts and R0	MedRxiv	2020-04-10	UK		Overall	Europe	2020-01-31	2020-03-31	1-2 months	Compartmental Model	90% Credible Interval	Not specified	6.73	5.63	9.63	y	y	y	y	y	N	y	y	y	8
7	7	Greg Dropkin	UK	COVID-19 UK Lockdown Forecasts and R0	Frontiers in Public Health	2020-05-29	UK		Overall	Europe	2020-01-31	2020-03-31	1-2 months	Compartmental Model	95% Credible Interval	Not specified	6.94	6.52	7.39	y	y	y	y	y	N	y	y	y	8
8	8	Kai Wang et al.	China	Current trends and future prediction of novel coronavirus disease (COVID-19) epidemic in China: a dynamical modeling analysis	Mathematical Biosciences and Engineering	2020-04-08	China	Overall	Overall	Asia	2020-01-10	2020-02-04	2 weeks-1 month	Compartmental Model	95% Confidence Interval	Not specified	5.78	5.71	5.89	y	y	y	y	NA	y	y	y	y	8
9	9	Cleo Anastassopoulou et al.	Greece, Italy	Data-based analysis, modelling and forecasting of the COVID-19 outbreak	PLoS ONE	2020-03-31	China	Hubei	Hubei	Asia	2020-01-11	2020-01-17	<= 2 weeks	Linear model	90% Confidence Interval	Mean	3.1	2.5	3.7	y	y	y	y	NA	y	N	y	y	7
9	9	Cleo Anastassopoulou et al.	Greece, Italy	Data-based analysis, modelling and forecasting of the COVID-19 outbreak	PLoS ONE	2020-03-31	China	Hubei	Hubei	Asia	2020-01-11	2020-01-19	<= 2 weeks	Linear model	90% Confidence Interval	Mean	6.09	5.02	7.16	y	y	y	y	NA	y	N	y	y	7
9	9	Cleo Anastassopoulou et al.	Greece, Italy	Data-based analysis, modelling and forecasting of the COVID-19 outbreak	PLoS ONE	2020-03-31	China	Hubei	Hubei	Asia	2020-01-11	2020-01-18	<= 2 weeks	Linear model	90% Confidence Interval	Mean	3.4	2.9	3.9	y	y	y	y	NA	y	N	y	y	7
9	9	Cleo Anastassopoulou et al.	Greece, Italy	Data-based analysis, modelling and forecasting of the COVID-19 outbreak	PLoS ONE	2020-03-31	China	Hubei	Hubei	Asia	2020-01-11	2020-01-17	<= 2 weeks	Linear model	90% Confidence Interval	Mean	4.6	3.56	5.65	y	y	y	y	NA	y	N	y	y	7
9	9	Cleo Anastassopoulou et al.	Greece, Italy	Data-based analysis, modelling and forecasting of the COVID-19 outbreak	PLoS ONE	2020-03-31	China	Hubei	Hubei	Asia	2020-01-11	2020-01-16	<= 2 weeks	Linear model	90% Confidence Interval	Mean	4.8	3.36	6.67	y	y	y	y	NA	y	N	y	y	7
9	9	Cleo Anastassopoulou et al.	Greece, Italy	Data-based analysis, modelling and forecasting of the COVID-19 outbreak	PLoS ONE	2020-03-31	China	Hubei	Hubei	Asia	2020-01-11	2020-01-20	<= 2 weeks	Linear model	90% Confidence Interval	Mean	7.09	5.84	8.35	y	y	y	y	NA	y	N	y	y	7
9	9	Cleo Anastassopoulou et al.	Greece, Italy	Data-based analysis, modelling and forecasting of the COVID-19 outbreak	PLoS ONE	2020-03-31	China	Hubei	Hubei	Asia	2020-01-11	2020-01-18	<= 2 weeks	Linear model	90% Confidence Interval	Mean	5.14	4.25	6.03	y	y	y	y	NA	y	N	y	y	7
9	9	Cleo Anastassopoulou et al.	Greece, Italy	Data-based analysis, modelling and forecasting of the COVID-19 outbreak	PLoS ONE	2020-03-31	China	Hubei	Hubei	Asia	2020-01-11	2020-01-16	<= 2 weeks	Linear model	90% Confidence Interval	Mean	3.2	2.4	4	y	y	y	y	NA	y	N	y	y	7
10	10	Adhin Bhaskar et al.	India	Distribution and growth rate of COVID-19 outbreak in Tamil Nadu: A log-linear regression approach	Indian Journal of Public Health	2020-06-02	India	Tamilnadu		Asia	2020-03-07	2020-04-16	1-2 months	Linear model	Minimum, maximum	Median	1.88	1.09	2.51	y	y	y	y	NA	y	y	y	y	8
11	11	Kenji Mizumoto et al.	Japan, USA	Early epidemiological assessment of the transmission potential and virulence of coronavirus disease 2019 (COVID-19) in Wuhan City, China, January–February, 2020	BMC Medicine	2020-07-15	China	Wuhan	Wuhan	Asia	2019-12-31	2020-02-11	1-2 months	Others	95% Credible Interval	Mean	3.49	3.39	3.62	y	y	y	y	NA	y	y	y	y	8
12	12	Qun Li et al.	China	Early Transmission Dynamics in Wuhan, China, of Novel Coronavirus–Infected Pneumonia	The New England Journal of Medicine	2020-03-26	China	Wuhan	Wuhan	Asia	2019-12-10	2020-01-22	1-2 months	Others	95% Confidence Interval	Not specified	2.2	1.4	3.9	y	y	y	y	NA	y	y	y	y	8
13	13	César V. Munayco et al.	Peru, USA	Early transmission dynamics of COVID-19 in a southern hemisphere setting: Lima-Peru: February 29th–March 30th, 2020.	MedRxiv	2020-05-08	Peru	Lima		South America	2020-02-29	2020-03-30	2 weeks-1 month	Others	95% Confidence Interval	Mean	2.3	2	2.5	y	y	y	y	NA	y	y	y	y	8
13	13	César V. Munayco et al.	Peru, USA	Early transmission dynamics of COVID-19 in a southern hemisphere setting: Lima-Peru: February 29th–March 30th, 2020.	MedRxiv	2020-05-08	Peru	Lima		South America	2020-02-29	2020-03-30	2 weeks-1 month	Others	95% Confidence Interval	Mean	2	1.7	2.3	y	y	y	y	NA	y	y	y	y	8
14	14	Moran Ki et al.	South Korea	Epidemiologic characteristics of early cases with 2019 novel coronavirus (2019-nCoV) disease in Korea	Epidemiology and Health	2020-02-09	South Korea		Overall	Asia	2020-01-20	2020-02-09	2 weeks-1 month	Exponential Growth Model	95% Confidence Interval	Not specified	0.48	0.25	0.84	y	y	y	y	NA	y	y	y	y	8
14	14	Moran Ki et al.	South Korea	Epidemiologic characteristics of early cases with 2019 novel coronavirus (2019-nCoV) disease in Korea	Epidemiology and Health	2020-02-09	South Korea		Overall	Asia	2020-01-20	2020-02-09	2 weeks-1 month	Exponential Growth Model	95% Confidence Interval	Not specified	0.48	0.28	0.69	y	y	y	y	NA	y	y	y	y	8
15	15	Nel Jason L. Haw et al.	Philippines, USA	Epidemiological profile and transmission dynamics of COVID-19 in the Philippines	Epidemiology and Infection	2020-09-15	Philippines		Overall	Asia	2020-02-11	2020-03-19	1-2 months	Method by Wallinga and Lipsitch	95% Confidence Interval	Not specified	2.41	2.33	2.48	y	y	y	y	NA	y	y	y	y	8
16	16	Qifang Bi et al.	USA, China	Epidemiology and transmission of COVID-19 in 391 cases and 1286 of their close contacts in Shenzhen, China: a retrospective cohort study	Lancet Infectious Disease	2020-04-27	China	Shenzhen	Outside Hubei	Asia	2020-01-14	2020-02-12	2 weeks-1 month	Others	95% Confidence Interval	Mean	0.4	0.3	0.5	y	y	y	y	NA	y	y	N	y	7
17	17	Mike Lonergan et al.	UK	Estimates of the ongoing need for social distancing and control measures post-“lockdown” from trajectories of COVID-19 cases and mortality	European Respiratory Journal	2020-05-26	USA		Overall	North America	2020-01-01	2020-05-21	> 2 months	Method by Wallinga and Lipsitch	95% Confidence Interval	Not specified	3.6	3.4	3.8	y	y	y	y	y	y	y	y	y	9
17	17	Mike Lonergan et al.	UK	Estimates of the ongoing need for social distancing and control measures post-“lockdown” from trajectories of COVID-19 cases and mortality	European Respiratory Journal	2020-05-26	USA		Overall	North America	2020-01-01	2020-05-21	> 2 months	Method by Wallinga and Lipsitch	95% Confidence Interval	Not specified	3.2	2.7	3.7	y	y	y	y	y	y	y	y	y	9
17	17	Mike Lonergan et al.	UK	Estimates of the ongoing need for social distancing and control measures post-“lockdown” from trajectories of COVID-19 cases and mortality	European Respiratory Journal	2020-05-26	UK		Overall	Europe	2020-01-01	2020-05-21	> 2 months	Method by Wallinga and Lipsitch	95% Confidence Interval	Not specified	2.6	2.4	2.9	y	y	y	y	y	y	y	y	y	9
17	17	Mike Lonergan et al.	UK	Estimates of the ongoing need for social distancing and control measures post-“lockdown” from trajectories of COVID-19 cases and mortality	European Respiratory Journal	2020-05-26	UK		Overall	Europe	2020-01-01	2020-05-21	> 2 months	Method by Wallinga and Lipsitch	95% Confidence Interval	Not specified	2.1	1.8	2.3	y	y	y	y	y	y	y	y	y	9
17	17	Mike Lonergan et al.	UK	Estimates of the ongoing need for social distancing and control measures post-“lockdown” from trajectories of COVID-19 cases and mortality	European Respiratory Journal	2020-05-26	Italy		Overall	Europe	2020-01-01	2020-05-21	> 2 months	Method by Wallinga and Lipsitch	95% Confidence Interval	Not specified	3.7	3.1	4.4	y	y	y	y	y	y	y	y	y	9
17	17	Mike Lonergan et al.	UK	Estimates of the ongoing need for social distancing and control measures post-“lockdown” from trajectories of COVID-19 cases and mortality	European Respiratory Journal	2020-05-26	Italy		Overall	Europe	2020-01-01	2020-05-21	> 2 months	Method by Wallinga and Lipsitch	95% Confidence Interval	Not specified	2.2	2	2.4	y	y	y	y	y	y	y	y	y	9
17	17	Mike Lonergan et al.	UK	Estimates of the ongoing need for social distancing and control measures post-“lockdown” from trajectories of COVID-19 cases and mortality	European Respiratory Journal	2020-05-26	France		Overall	Europe	2020-01-01	2020-05-21	> 2 months	Method by Wallinga and Lipsitch	95% Confidence Interval	Not specified	2	1.8	2.1	y	y	y	y	y	y	y	y	y	9
17	17	Mike Lonergan et al.	UK	Estimates of the ongoing need for social distancing and control measures post-“lockdown” from trajectories of COVID-19 cases and mortality	European Respiratory Journal	2020-05-26	France		Overall	Europe	2020-01-01	2020-05-21	> 2 months	Method by Wallinga and Lipsitch	95% Confidence Interval	Not specified	2.7	2.4	3	y	y	y	y	y	y	y	y	y	9
17	17	Mike Lonergan et al.	UK	Estimates of the ongoing need for social distancing and control measures post-“lockdown” from trajectories of COVID-19 cases and mortality	European Respiratory Journal	2020-05-26	Spain		Overall	Europe	2020-01-01	2020-05-21	> 2 months	Method by Wallinga and Lipsitch	95% Confidence Interval	Not specified	3.2	2.4	4.1	y	y	y	y	y	y	y	y	y	9
17	17	Mike Lonergan et al.	UK	Estimates of the ongoing need for social distancing and control measures post-“lockdown” from trajectories of COVID-19 cases and mortality	European Respiratory Journal	2020-05-26	Spain		Overall	Europe	2020-01-01	2020-05-21	> 2 months	Method by Wallinga and Lipsitch	95% Confidence Interval	Not specified	2.2	2.1	2.4	y	y	y	y	y	y	y	y	y	9
18	18	Shi Zhao et al.	China, USA	Estimating the Unreported Number of Novel Coronavirus (2019-nCoV) Cases in China in the First Half of January 2020: A Data-Driven Modelling Analysis of the Early Outbreak	Journal of Clinical Medicine	2020-02-01	China	Mainland	Overall	Asia	2019-12-01	2020-01-24	1-2 months	Exponential Growth Model	95% Confidence Interval	Not specified	2.56	2.49	2.63	y	y	y	y	NA	y	y	y	y	8
19	19	Salihu S. Musa et al.	China, Nigeria	Estimation of exponential growth rate and basic reproduction number of the coronavirus disease 2019 (COVID-19) in Africa	Infectious Diseases of Poverty	2020-07-16	Africa		Overall	North America	2020-03-01	2020-04-13	1-2 months	Exponential Growth Model	95% Confidence Interval	Mean	2.37	2.22	2.51	y	y	y	y	NA	y	y	y	y	8
20	21	Chen Xu et al.	China	Estimation of reproduction numbers of COVID-19 in typical countries and epidemic trends under different prevention and control scenarios	Frontiers in Medicine	2020-04-05	South Korea		Overall	Asia	2020-01-20	2020-03-23	> 2 months	Compartmental Model	95% Confidence Interval	Not specified	1.593	1.582	1.604	y	y	y	y	NA	y	y	y	y	8
20	21	Chen Xu et al.	China	Estimation of reproduction numbers of COVID-19 in typical countries and epidemic trends under different prevention and control scenarios	Frontiers in Medicine	2020-04-05	USA		Overall	North America	2020-01-20	2020-03-23	> 2 months	Compartmental Model	95% Confidence Interval	Not specified	8.213	8.139	8.288	y	y	y	y	NA	y	y	y	y	8
21	22	Liuyong Pang et al.	China, Australia	Transmission dynamics and control strategies of Covid-19 in Wuhan, China	Journal of Biological Systems	2020-04-30	China	Wuhan	Wuhan	Asia	2019-12-31	2020-01-23	2 weeks-1 month	Compartmental Model	95% Confidence Interval	Not specified	4.6355	3.7552	5.4153	y	y	y	y	NA	y	y	y	y	8
22	24	Karthick Kanagarathinam et al.	India	Estimation of the reproduction number and early prediction of the COVID-19 outbreak in India using a statistical computing approach	Epidemiology and Health	2020-05-09	India		Overall	Asia	2020-03-02	2020-04-02	2 weeks-1 month	Compartmental Model	95% Confidence Interval	Median	1.471	1.351	1.592	y	y	y	y	NA	y	y	y	y	8
23	25	Sheng Zhang et al.	China	Estimation of the reproductive number of novel coronavirus (COVID-19) and the probable outbreak size on the Diamond Princess cruise ship: A data-driven analysis	International Journal of Infectious Diseases	2020-02-22	Diamond Princess Cruiseship		Overall		2020-01-20	2020-02-16	2 weeks-1 month	Others	95% Confidence Interval	Median	2.28	2.06	2.52	y	y	y	y	NA	Y	N	y	y	7
24	26	Chong You et al.	China	Estimation of the time-varying reproduction number of COVID-19 outbreak in china	International Journal of Hygiene and Environmental Health	2020-05-11	China	Shanghai	Outside Hubei	Asia	2020-01-21	2020-01-28	<= 2 weeks	Exponential Growth Model	95% Confidence Interval	Not specified	1.92	0.88	3.3	y	y	y	y	NA	y	N	y	y	7
24	26	Chong You et al.	China	Estimation of the time-varying reproduction number of COVID-19 outbreak in china	International Journal of Hygiene and Environmental Health	2020-05-11	China	Hubei	Hubei	Asia	2020-01-21	2020-01-28	<= 2 weeks	Compartmental Model	95% Confidence Interval	Not specified	6.8	5.1	8.5	y	y	y	y	NA	y	N	y	y	7
24	26	Chong You et al.	China	Estimation of the time-varying reproduction number of COVID-19 outbreak in china	International Journal of Hygiene and Environmental Health	2020-05-11	China	Zhejiang	Outside Hubei	Asia	2020-01-21	2020-01-28	<= 2 weeks	Others	95% Confidence Interval	Not specified	2.67	2.02	3.48	y	y	y	y	NA	y	N	y	y	7
24	26	Chong You et al.	China	Estimation of the time-varying reproduction number of COVID-19 outbreak in china	International Journal of Hygiene and Environmental Health	2020-05-11	China	Shanghai	Outside Hubei	Asia	2020-01-21	2020-01-28	<= 2 weeks	Others	95% Confidence Interval	Not specified	2.24	1.56	2.95	y	y	y	y	NA	y	N	y	y	7
24	26	Chong You et al.	China	Estimation of the time-varying reproduction number of COVID-19 outbreak in china	International Journal of Hygiene and Environmental Health	2020-05-11	China	Hubei	Hubei	Asia	2020-01-21	2020-01-28	<= 2 weeks	Others	95% Confidence Interval	Not specified	2.73	2.06	3.61	y	y	y	y	NA	y	N	y	y	7
24	26	Chong You et al.	China	Estimation of the time-varying reproduction number of COVID-19 outbreak in china	International Journal of Hygiene and Environmental Health	2020-05-11	China	Guangdong	Outside Hubei	Asia	2020-01-21	2020-01-28	<= 2 weeks	Others	95% Confidence Interval	Not specified	2.44	1.82	3.15	y	y	y	y	NA	y	N	y	y	7
24	26	Chong You et al.	China	Estimation of the time-varying reproduction number of COVID-19 outbreak in china	International Journal of Hygiene and Environmental Health	2020-05-11	China	Henan	Outside Hubei	Asia	2020-01-21	2020-01-28	<= 2 weeks	Compartmental Model	95% Confidence Interval	Not specified	7.8	4.1	12.8	y	y	y	y	NA	y	N	y	y	7
24	26	Chong You et al.	China	Estimation of the time-varying reproduction number of COVID-19 outbreak in china	International Journal of Hygiene and Environmental Health	2020-05-11	China	Guangdong	Outside Hubei	Asia	2020-01-21	2020-01-28	<= 2 weeks	Compartmental Model	95% Confidence Interval	Not specified	4.5	3.2	6	y	y	y	y	NA	y	N	y	y	7
24	26	Chong You et al.	China	Estimation of the time-varying reproduction number of COVID-19 outbreak in china	International Journal of Hygiene and Environmental Health	2020-05-11	China	Henan	Outside Hubei	Asia	2020-01-21	2020-01-28	<= 2 weeks	Others	95% Confidence Interval	Not specified	2.38	1.8	3.1	y	y	y	y	NA	y	N	y	y	7
24	26	Chong You et al.	China	Estimation of the time-varying reproduction number of COVID-19 outbreak in china	International Journal of Hygiene and Environmental Health	2020-05-11	China	Guangdong	Outside Hubei	Asia	2020-01-21	2020-01-28	<= 2 weeks	Exponential Growth Model	95% Confidence Interval	Not specified	2.77	1.59	4.4	y	y	y	y	NA	y	N	y	y	7
24	26	Chong You et al.	China	Estimation of the time-varying reproduction number of COVID-19 outbreak in china	International Journal of Hygiene and Environmental Health	2020-05-11	China	Henan	Outside Hubei	Asia	2020-01-21	2020-01-28	<= 2 weeks	Exponential Growth Model	95% Confidence Interval	Not specified	3.41	1.45	6.03	y	y	y	y	NA	y	N	y	y	7
24	26	Chong You et al.	China	Estimation of the time-varying reproduction number of COVID-19 outbreak in china	International Journal of Hygiene and Environmental Health	2020-05-11	China	Beijing	Outside Hubei	Asia	2020-01-21	2020-01-28	<= 2 weeks	Exponential Growth Model	95% Confidence Interval	Not specified	1.74	0.57	3.26	y	y	y	y	NA	y	N	y	y	7
24	26	Chong You et al.	China	Estimation of the time-varying reproduction number of COVID-19 outbreak in china	International Journal of Hygiene and Environmental Health	2020-05-11	China	Beijing	Outside Hubei	Asia	2020-01-21	2020-01-28	<= 2 weeks	Others	95% Confidence Interval	Not specified	2.13	1.53	2.81	y	y	y	y	NA	y	N	y	y	7
24	26	Chong You et al.	China	Estimation of the time-varying reproduction number of COVID-19 outbreak in china	International Journal of Hygiene and Environmental Health	2020-05-11	China	Beijing	Outside Hubei	Asia	2020-01-21	2020-01-28	<= 2 weeks	Compartmental Model	95% Confidence Interval	Not specified	2.7	1	4.6	y	y	y	y	NA	y	N	y	y	7
24	26	Chong You et al.	China	Estimation of the time-varying reproduction number of COVID-19 outbreak in china	International Journal of Hygiene and Environmental Health	2020-05-11	China	Shanghai	Outside Hubei	Asia	2020-01-21	2020-01-28	<= 2 weeks	Compartmental Model	95% Confidence Interval	Not specified	2.8	1	4.5	y	y	y	y	NA	y	N	y	y	7
24	26	Chong You et al.	China	Estimation of the time-varying reproduction number of COVID-19 outbreak in china	International Journal of Hygiene and Environmental Health	2020-05-11	China	Zhejiang	Outside Hubei	Asia	2020-01-21	2020-01-28	<= 2 weeks	Compartmental Model	95% Confidence Interval	Not specified	6.2	3.9	8.7	y	y	y	y	NA	y	N	y	y	7
24	26	Chong You et al.	China	Estimation of the time-varying reproduction number of COVID-19 outbreak in china	International Journal of Hygiene and Environmental Health	2020-05-11	China	Zhejiang	Outside Hubei	Asia	2020-01-21	2020-01-28	<= 2 weeks	Exponential Growth Model	95% Confidence Interval	Not specified	3.03	1.43	5.26	y	y	y	y	NA	y	N	y	y	7
24	26	Chong You et al.	China	Estimation of the time-varying reproduction number of COVID-19 outbreak in china	International Journal of Hygiene and Environmental Health	2020-05-11	China	Hubei	Hubei	Asia	2020-01-21	2020-01-28	<= 2 weeks	Exponential Growth Model	95% Confidence Interval	Not specified	3.63	2.56	5.22	y	y	y	y	NA	y	N	y	y	7
25	27	Andrea Maugeri et al.	Italy	Estimation of Unreported Novel Coronavirus (SARS-CoV-2) Infections from Reported Deaths: Estimation of Unreported Novel Coronavirus (SARS-CoV-2) Infections from Reported Deaths:	Journal of Clinical Medicine	2020-05-05	China	Overall	Overall	Asia	2019-12-31	2020-01-23	2 weeks-1 month	Compartmental Model	95% Confidence Interval	Not specified	2.43	2.42	2.44	y	y	y	y	NA	y	y	y	y	8
26	28	David H. Glass	UK	European and US lockdowns and second waves during the COVID-19 pandemic	Mathematical Biosciences	2020-09-24	France		Overall	Europe	2020-03-05	2020-03-17	<= 2 weeks	Compartmental Model	95% Confidence Interval	Not specified	2.02	1.69	2.35	y	y	y	y	y	y	N	y	y	8
26	28	David H. Glass	UK	European and US lockdowns and second waves during the COVID-19 pandemic	Mathematical Biosciences	2020-09-24	Germany		Overall	Europe	2020-03-05	2020-03-23	2 weeks-1 month	Compartmental Model	95% Confidence Interval	Not specified	2.09	1.83	2.34	y	y	y	y	y	y	N	y	y	8
26	28	David H. Glass	UK	European and US lockdowns and second waves during the COVID-19 pandemic	Mathematical Biosciences	2020-09-24	Italy		Overall	Europe	2020-02-27	2020-03-10	<= 2 weeks	Compartmental Model	95% Confidence Interval	Not specified	2.16	2.01	2.31	y	y	y	y	y	y	N	y	y	8
26	28	David H. Glass	UK	European and US lockdowns and second waves during the COVID-19 pandemic	Mathematical Biosciences	2020-09-24	Spain		Overall	Europe	2020-03-05	2020-03-15	<= 2 weeks	Compartmental Model	95% Confidence Interval	Not specified	2.42	2.19	2.66	y	y	y	y	y	y	N	y	y	8
26	28	David H. Glass	UK	European and US lockdowns and second waves during the COVID-19 pandemic	Mathematical Biosciences	2020-09-24	UK		Overall	Europe	2020-03-10	2020-03-24	<= 2 weeks	Compartmental Model	95% Confidence Interval	Not specified	2.03	1.81	2.25	y	y	y	y	y	y	N	y	y	8
26	28	David H. Glass	UK	European and US lockdowns and second waves during the COVID-19 pandemic	Mathematical Biosciences	2020-09-24	USA		Overall	North America	2020-03-06	2020-06-04	> 2 months	Compartmental Model	95% Confidence Interval	Not specified	2.22	1.94	2.49	y	y	y	y	y	y	N	y	y	8
27	29	Yunjun Zhang et al.	China	Evaluating Transmission Heterogeneity and Super-Spreading Event of COVID-19 in a Metropolis of China	International Journal of Environmental Research and Public Health	2020-05-24	China	Tianjin	Outside Hubei	Asia	2020-01-21	2020-02-26	1-2 months	Others	95% Confidence Interval	Not specified	0.67	0.54	0.84	y	y	y	y	NA	y	y	y	y	8
27	29	Yunjun Zhang et al.	China	Evaluating Transmission Heterogeneity and Super-Spreading Event of COVID-19 in a Metropolis of China	International Journal of Environmental Research and Public Health	2020-05-24	China	Tianjin	Outside Hubei	Asia	2020-01-21	2020-02-26	1-2 months	Others	95% Confidence Interval	Not specified	0.67	0.44	1.03	y	y	y	y	NA	y	y	y	y	8
28	33	Jia Wangping et al.	China	Extended SIR Prediction of the Epidemics Trend of COVID-19 in Italy and Compared With Hunan, China	Frontiers in Medicine	2020-05-06	China	Hunan	Outside Hubei	Asia	2020-01-22	2020-04-02	> 2 months	Compartmental Model	95% Credible Interval	Mean	3.16	1.73	5.25	y	y	y	y	NA	y	y	y	y	8
28	33	Jia Wangping et al.	China	Extended SIR Prediction of the Epidemics Trend of COVID-19 in Italy and Compared With Hunan, China	Frontiers in Medicine	2020-05-06	Italy		Overall	Europe	2020-01-22	2020-04-02	> 2 months	Compartmental Model	95% Credible Interval	Mean	4.34	3.04	6	y	y	y	y	NA	y	y	y	y	8
29	34	Zhongxiang Chen et al.	China	Forecast Possible Risk for COVID-19 Epidemic Dissemination under Current Control Strategies in Japan	International Journal of Environmental Research and Public Health	2020-05-29	Japan		Overall	Asia	2020-03-15	2020-03-31	2 weeks-1 month	Compartmental Model	95% Confidence Interval	Not specified	1.954	1.851	2.025	y	y	y	y	NA	y	y	y	y	8
29	34	Zhongxiang Chen et al.	China	Forecast Possible Risk for COVID-19 Epidemic Dissemination under Current Control Strategies in Japan	International Journal of Environmental Research and Public Health	2020-05-29	Japan		Overall	Asia	2020-03-06	2020-03-15	<= 2 weeks	Compartmental Model	95% Confidence Interval	Not specified	1.053	0.885	1.641	y	y	y	y	NA	y	y	y	y	8
29	34	Zhongxiang Chen et al.	China	Forecast Possible Risk for COVID-19 Epidemic Dissemination under Current Control Strategies in Japan	International Journal of Environmental Research and Public Health	2020-05-29	Japan		Overall	Asia	2020-01-01	2020-02-26	1-2 months	Compartmental Model	95% Confidence Interval	Not specified	1.614	1.449	1.649	y	y	y	y	NA	y	y	y	y	8
29	34	Zhongxiang Chen et al.	China	Forecast Possible Risk for COVID-19 Epidemic Dissemination under Current Control Strategies in Japan	International Journal of Environmental Research and Public Health	2020-05-29	Japan		Overall	Asia	2020-02-27	2020-03-06	<= 2 weeks	Compartmental Model	95% Confidence Interval	Not specified	1.484	0.926	1.86	y	y	y	y	NA	y	y	y	y	8
30	38	Elinor Aviv-Sharon et al.	Israel	Generalized logistic growth modeling of the COVID-19 pandemic in Asia	Infectious Disease Modelling	2020-07-24	China	Mainland	Overall	Asia	2020-01-21	2020-07-01	> 2 months	Logistic Model	95% Confidence Interval	Not specified	3.59	3.39	3.79	y	y	y	y	NA	y	y	y	y	8
30	38	Elinor Aviv-Sharon et al.	Israel	Generalized logistic growth modeling of the COVID-19 pandemic in Asia	Infectious Disease Modelling	2020-07-24	Iran		Overall	Asia	2020-02-21	2020-07-01	> 2 months	Logistic Model	95% Confidence Interval	Not specified	1.86	1.83	1.89	y	y	y	y	NA	y	y	y	y	8
30	38	Elinor Aviv-Sharon et al.	Israel	Generalized logistic growth modeling of the COVID-19 pandemic in Asia	Infectious Disease Modelling	2020-07-24	Philippines		Overall	Asia	2020-02-15	2020-07-01	> 2 months	Logistic Model	95% Confidence Interval	Not specified	3	2.8	3.2	y	y	y	y	NA	y	y	y	y	8
30	38	Elinor Aviv-Sharon et al.	Israel	Generalized logistic growth modeling of the COVID-19 pandemic in Asia	Infectious Disease Modelling	2020-07-24	Taiwan		Overall	Asia	2020-02-15	2020-07-01	> 2 months	Logistic Model	95% Confidence Interval	Not specified	2.26	1.86	2.66	y	y	y	y	NA	y	y	y	y	8
31	40	Shi Zhao	China, Austria, Israel	Imitation dynamics in the mitigation of the novel coronavirus disease (COVID-19) outbreak in Wuhan, China from 2019 to 2020	Annals of Translational Medicine	2020-03-25	China	Wuhan	Wuhan	Asia	2019-12-01	2020-01-08	1-2 months	Compartmental Model	95% Confidence Interval	Not specified	2.5	2.4	2.7	y	y	y	y	NA	y	y	y	y	8
32	41	Junyuang yang et al.	China, Canada	Analysis of the age-structured epidemiological characteristics of sars-cov-2 transmission in mainland china: an aggregated approach	Mathematical Modelling of Natural Phenomena	2020-08-17	China	Mainland	Overall	Asia	2020-01-24	2020-03-31	> 2 months	Compartmental Model	95% Confidence Interval	Median	1.6811	1.6782	1.684	y	y	y	y	NA	y	y	y	y	8
33	43	Henrik Salje et al.	France, UK, USA	Estimating the burden of SARS-CoV-2 in France	Science	2020-05-13	France		Overall	Europe	2020-03-01	2020-03-16	2 weeks-1 month	Others	95% Credible Interval	Not specified	2.9	2.81	3.01	y	y	y	y	NA	y	CD	y	y	7
34	45	Laura Di Domenico et al.	France	Impact of lockdown on COVID-19 epidemic in Île-de-France and possible exit strategies	BMC Medicine	2020-07-30	France		Overall	Europe	2020-03-02	2020-03-16	<= 2 weeks	Compartmental Model	95% Confidence Interval	Not specified	3.18	3.09	3.24	y	y	y	y	y	y	y	y	y	9
35	46	Purvi Patel et al.	India	Impact of nonpharmacological interventions on COVID-19 transmission dynamics in India	Indian Journal of Public Health	2020-06-02	India		Overall	Asia	2020-01-30	2020-05-04	> 2 months	Others	95% Confidence Interval	Not specified	2.38	1.79	3.07	y	y	y	y	NA	y	y	y	y	8
36	47	Kai Wang et al.	China	Estimating the serial interval of the novel coronavirus disease (COVID-19) based on the public surveillance data in Shenzhen, China, from 19 January to 22 February 2020	Transboundary Emerging Diseases	2020-05-26	China	Shenzhen	Outside Hubei	Asia	2020-01-15	2020-02-24	1-2 months	Others	95% Confidence Interval	Not specified	2.6	2.4	2.8	y	y	y	y	NA	y	y	y	y	8
37	48	Steven Sanche et al.	USA	High Contagiousness and Rapid Spread of Severe Acute Respiratory Syndrome Coronavirus 2	Emerging Infectious Diseases	2020-07-01	China	Wuhan	Wuhan	Asia	2020-01-15	2020-01-30	2 weeks-1 month	Exponential Growth Model	95% Confidence Interval	Median	5.8	4.4	7.7	y	y	y	y	NA	y	N	y	y	7
37	48	Steven Sanche et al.	USA	High Contagiousness and Rapid Spread of Severe Acute Respiratory Syndrome Coronavirus 2	Emerging Infectious Diseases	2020-07-01	China	Wuhan	Wuhan	Asia	2020-01-15	2020-01-30	2 weeks-1 month	Exponential Growth Model	95% Confidence Interval	Median	5.7	3.8	8.9	y	y	y	y	NA	y	N	y	y	7
38	49	SR Patrikar et al.	India	Incubation Period and Reproduction Number for novel coronavirus (COVID-19) infections in India	MedRxiv	2020-06-29	India		Overall	Asia				Exponential Growth Model	95% Confidence Interval	Mean	2.63	2.27	2.99	y	y	y	y	y	y	NR	y	y	8
38	49	SR Patrikar et al.	India	Incubation Period and Reproduction Number for novel coronavirus (COVID-19) infections in India	MedRxiv	2020-06-29	India		Overall	Asia				Others	95% Confidence Interval	Mean	2.5	2.21	2.79	y	y	y	y	y	y	NR	y	y	8
38	49	SR Patrikar et al.	India	Incubation Period and Reproduction Number for novel coronavirus (COVID-19) infections in India	MedRxiv	2020-06-29	India		Overall	Asia				Others	95% Confidence Interval	Mean	2.61	2.27	2.95	y	y	y	y	y	y	NR	y	y	8
38	49	SR Patrikar et al.	India	Incubation Period and Reproduction Number for novel coronavirus (COVID-19) infections in India	MedRxiv	2020-06-29	India		Overall	Asia				Others	95% Confidence Interval	Mean	2.6	2.34	2.86	y	y	y	y	y	y	NR	y	y	8
39	50	Kin On Kwok et al.	China, Singapore, UK	Inferring super-spreading from transmission clusters of COVID-19 in Hong Kong, Japan, and Singapore	Journal of Hospital Infection	2020-05-22	Hongkong		Overall	Asia	2020-01-23	2020-03-03	1-2 months	Others	90% Confidence Interval	Not specified	0.61	0.47	0.78	y	y	y	y	NA	y	y	y	y	8
39	50	Kin On Kwok et al.	China, Singapore, UK	Inferring super-spreading from transmission clusters of COVID-19 in Hong Kong, Japan, and Singapore	Journal of Hospital Infection	2020-05-22	Japan		Overall	Asia	2020-01-16	2020-03-03	1-2 months	Others	90% Confidence Interval	Not specified	0.48	0.39	0.59	y	y	y	y	NA	y	y	y	y	8
39	50	Kin On Kwok et al.	China, Singapore, UK	Inferring super-spreading from transmission clusters of COVID-19 in Hong Kong, Japan, and Singapore	Journal of Hospital Infection	2020-05-22	Singapore		Overall	Asia	2020-01-23	2020-03-03	1-2 months	Others	90% Confidence Interval	Not specified	0.7	0.55	0.89	y	y	y	y	NA	y	y	y	y	8
40	51	Mark J. Willis et al.	UK, Colombia, Switzerland	Insights into the dynamics and control of COVID-19 infection rates	Chaos, Solitons and Fractals	2020-05-28	Germany		Overall	Europe	2020-03-02	2020-05-16	> 2 months	Others	Plus, minus	Not specified	3.16	3.06	3.26	y	y	y	y	NA	y	y	N	y	7
40	51	Mark J. Willis et al.	UK, Colombia, Switzerland	Insights into the dynamics and control of COVID-19 infection rates	Chaos, Solitons and Fractals	2020-05-28	Spain		Overall	Europe	2020-03-02	2020-05-16	> 2 months	Others	Plus, minus	Not specified	3.68	3.65	3.71	y	y	y	y	NA	y	y	N	y	7
40	51	Mark J. Willis et al.	UK, Colombia, Switzerland	Insights into the dynamics and control of COVID-19 infection rates	Chaos, Solitons and Fractals	2020-05-28	Sweden		Overall	Europe	2020-03-02	2020-05-16	> 2 months	Others	Plus, minus	Not specified	2.73	2.58	2.88	y	y	y	y	NA	y	y	N	y	7
41	52	Adeshina I. Adekunle et al.	Australia, Nigeria	Is Nigeria really on top of COVID-19? Message from effective reproduction number	Epidemiology and Infection	2020-07-31	Nigeria		Overall	Africa	2020-02-27	2020-05-07	> 2 months	Compartmental Model	95% Credible Interval	Median	2.42	2.37	2.47	y	y	y	y	NA	y	y	y	y	8
42	56	M. Veera Krishna	India	Mathematical modelling on diffusion and control of COVIDe19	Infectious Disease Modelling	2020-08-21	China		Overall	Asia	2020-01-01	2020-02-01	2 weeks-1 month	Compartmental Model	95% Confidence Interval	Median	2.45	1.16	4.87	y	y	y	y	NA	y	y	y	y	8
43	64	S. Marimuthu et al.	India -6	Modelling of reproduction number for COVID-19 in India and high incidence states	Clinical Epidemiology and Global Health	2020-06-30	India		Overall	Asia	2020-03-02	2020-03-08	<= 2 weeks	Exponential Growth Model	95% Confidence Interval	Mean	1.379	1.375	1.384	y	y	y	y	NA	y	N	y	y	7
44	66	Li-Xiang Feng et al.	China - 5	Modelling the effects of media coverage and quarantine on the COVID-19 infections in the UK	Mathematical Biosciences and Engineering	2020-05-13	UK		Overall	Europe	2020-02-01	2020-03-23	1-2 months	Compartmental Model	95% Confidence Interval	Mean	4.2816	3.8882	4.675	y	y	y	y	NA	y	y	y	y	8
45	67	Joseph T Wu et al.	China - 3	Nowcasting and forecasting the potential domestic and international spread of the 2019-nCoV outbreak originating in Wuhan, China: a modelling study	Lancet	2020-01-31	China		Overall	Asia	2019-12-31	2020-01-28	2 weeks-1 month	Compartmental Model	95% Credible Interval	Mean	2.68	2.47	2.86	y	y	y	y	NA	y	y	y	y	8
46	68	Yifan Zhu et al.	USA - 2	On a Statistical Transmission Model in Analysis of the Early Phase of COVID‐19 Outbreak	Statistics in Biosciences	2020-03-23	China		Overall	Asia	2019-12-01	2020-01-23	1-2 months	Others	95% Confidence Interval	Not specified	2.47	2.39	2.55	y	y	y	y	NA	y	y	y	y	8
46	68	Yifan Zhu et al.	USA - 2	On a Statistical Transmission Model in Analysis of the Early Phase of COVID‐19 Outbreak	Statistics in Biosciences	2020-03-23	China		Overall	Asia	2019-12-01	2020-01-23	1-2 months	Others	95% Confidence Interval	Not specified	2.54	2.49	2.6	y	y	y	y	NA	y	y	y	y	8
47	69	Mathias Peirlinck et al.	USA - 3 Chile - 1	Outbreak dynamics of COVID-19 in China and the United States	Biomechanics and Modeling in Mechanobiology	2020-04-27	China		Overall	Asia	2020-01-22	2020-04-04	> 2 months	Compartmental Model	Plus, minus SD	Not specified	12.58	9.41	15.75	y	N	y	y	NA	y	y	y	y	7
47	69	Mathias Peirlinck et al.	USA - 3 Chile - 1	Outbreak dynamics of COVID-19 in China and the United States	Biomechanics and Modeling in Mechanobiology	2020-04-27	USA		Overall	North America	2020-01-22	2020-04-04	> 2 months	Compartmental Model	Plus, minus SD	Not specified	5.3	4.35	6.25	y	N	y	y	NA	y	y	y	y	7
48	70	Kevin Linka et al.	US - 3 Chile - 1	Outbreak dynamics of COVID-19 in Europe and the effect of travel restrictions	Computer Methods Biomechanics and Biomedical Engineering	2020-09-01	Europe	European Union		Europe	2020-01-22	2020-04-13	> 2 months	Compartmental Model	Plus, minus SD	Mean	4.62	3.3	5.94	y	y	y	y	NA	y	y	y	N	7
49	72	Julien Riou et al.	Switzerland - 2	Pattern of early human-to-human transmission of Wuhan 2019 novel coronavirus (2019-nCoV), December 2019 to January 2020	Eurosurveillance	2020-01-30	China		Overall	Asia	2019-11-27	2020-01-18	1-2 months	Others	90% High Density Interval	Median	2.2	1.4	3.8	y	y	y	y	NA	y	y	y	y	8
50	73	Xiaomei Feng et al.	China - 7 USA - 1	Phase-adjusted estimation of the COVID-19 outbreak in South Korea under multi-source data and adjustment measures: a modelling study	Mathematical Biosciences and Engineering	2020-05-18	South Korea		Overall	Asia	2020-02-16	2020-03-09	2 weeks-1 month	Compartmental Model	95% Credible Interval	Mean	4.79	4.38	5.2	y	y	y	y	NA	y	y	y	y	8
51	74	Hémaho B. Taboe et al.	Benin - 3 Usa - 2	Predicting COVID-19 spread in the face of control measures in West Africa	Mathematical Biosciences	2020-07-29	West Africa		Overall	North America	2020-02-28	2020-06-26	> 2 months	Compartmental Model	95% Confidence Interval	Mean	1.854	1.84	1.868	y	y	y	y	NA	y	y	y	y	8
52	77	Abdallah Alsayed et al.	Malaysia	Prediction of Epidemic Peak and Infected Cases for COVID-19 Disease in Malaysia, 2020	International Journal of Environmental Research and Public Health	2020-06-08	Malaysia		Overall	Asia	2020-01-25	2020-04-05	> 2 months	Compartmental Model	Plus, minus	Not specified	2.28	2.15	2.41	y	y	y	y	NA	y	y	y	y	8
53	78	Toshikazu Kuniya	Japan	Prediction of the Epidemic Peak of Coronavirus Disease in Japan, 2020	Journal of Clinical Medicine	2020-03-13	Japan		Overall	Asia	2020-01-15	2020-02-29	1-2 months	Compartmental Model	95% Confidence Interval	Not specified	2.6	2.4	2.8	y	y	O	y	NA	y	N	y	y	6
54	79	Zian Zhuang	China	Preliminary estimates of the reproduction number of the coronavirus disease (COVID-19) outbreak in Republic of Korea and Italy by 5 March 2020	International Journal of Infectious Diseases	2020-04-17	Italy		Overall	Europe	2020-01-20	2020-03-05	1-2 months	Others	95% Confidence Interval	Mean	3.3	3	3.6	y	y	y	y	NA	y	y	y	y	8
54	79	Zian Zhuang	China	Preliminary estimates of the reproduction number of the coronavirus disease (COVID-19) outbreak in Republic of Korea and Italy by 5 March 2020	International Journal of Infectious Diseases	2020-04-17	Italy		Overall	Europe	2020-01-20	2020-03-05	1-2 months	Others	95% Confidence Interval	Mean	2.6	2.3	2.9	y	y	y	y	NA	y	y	y	y	8
54	79	Zian Zhuang	China	Preliminary estimates of the reproduction number of the coronavirus disease (COVID-19) outbreak in Republic of Korea and Italy by 5 March 2020	International Journal of Infectious Diseases	2020-04-17	South Korea		Overall	Asia	2020-01-20	2020-03-05	1-2 months	Others	95% Confidence Interval	Mean	2.6	2.3	2.9	y	y	y	y	NA	y	y	y	y	8
54	79	Zian Zhuang	China	Preliminary estimates of the reproduction number of the coronavirus disease (COVID-19) outbreak in Republic of Korea and Italy by 5 March 2020	International Journal of Infectious Diseases	2020-04-17	South Korea		Overall	Asia	2020-01-20	2020-03-05	1-2 months	Others	95% Confidence Interval	Mean	3.2	2.9	3.5	y	y	y	y	NA	y	y	y	y	8
55	80	Chawarat Rotejanaprasert et al.	Thailand	Preliminary estimation of temporal and spatiotemporal dynamic measures of COVID- 19 transmission in Thailand	PLoS ONE	2020-09-24	Thailand		Overall	Asia	2020-01-12	2020-06-30	> 2 months	Exponential Growth Model	95% Confidence Interval	Mean	3.76	2.23	5.9	y	y	y	y	NA	y	y	y	y	8
55	80	Chawarat Rotejanaprasert et al.	Thailand	Preliminary estimation of temporal and spatiotemporal dynamic measures of COVID- 19 transmission in Thailand	PLoS ONE	2020-09-24	Thailand		Overall	Asia	2020-01-12	2020-06-30	> 2 months	Exponential Growth Model	95% Confidence Interval	Mean	3.74	2.49	5.51	y	y	y	y	NA	y	y	y	y	8
56	81	Shi Zhao et al.	China	Preliminary estimation of the basic reproduction number of novel coronavirus (2019-nCoV) in China, from 2019 to 2020: A data-driven analysis in the early phase of the outbreak	International Journal of Infectious Diseases	2020-01-27	China		Overall	Asia	2020-01-10	2020-01-24	<= 2 weeks	Exponential Growth Model	95% Confidence Interval	Mean	5.71	4.24	7.54	y	y	y	y	NA	y	N	y	y	7
57	83	Kai Wang et al.	China	Real-time estimation of the reproduction number of the novel coronavirus disease (COVID-19) in China in 2020 based on incidence data	Annals of Translational Medicine	2020-04-21	China		Overall	Asia	2020-01-10	2020-01-16	<= 2 weeks	Others	95% Confidence Interval	Mean	4.95	4.26	5.67	y	y	y	y	NA	y	N	y	y	7
58	84	Sung-mok Jung et al.	US	Real-Time Estimation of the Risk of Death from Novel Coronavirus (COVID-19) Infection: Inference Using Exported Cases	Journal of Clinical Medicine	2020-02-14	China		Overall	Asia	2019-12-31	2020-01-24	2 weeks-1 month	Exponential Growth Model	95% Confidence Interval	Mean	3.2	2.7	3.7	y	y	y	y	y	y	y	y	y	9
58	84	Sung-mok Jung et al.	US	Real-Time Estimation of the Risk of Death from Novel Coronavirus (COVID-19) Infection: Inference Using Exported Cases	Journal of Clinical Medicine	2020-02-14	China		Overall	Asia	2019-12-31	2020-01-24	2 weeks-1 month	Exponential Growth Model	95% Confidence Interval	Mean	2.1	2	2.2	y	y	y	y	y	y	y	y	y	9
59	85	Xingjie Hao et al.	China	Reconstruction of the full transmission dynamics of COVID-19 in Wuhan	Nature	2020-07-16	China		Overall	Asia	2020-01-01	2020-03-08	> 2 months	Others	95% Credible Interval	Mean	3.54	3.4	3.67	y	y	y	y	NA	y	y	y	y	8
60	87	Soyoung Kim eet al.	South Korea	Risk estimation of the SARS-CoV-2 acute respiratory disease outbreak outside China	Theoretical Biology and Medical Modelling	2020-06-05	China		Overall	Asia	2020-01-11	2020-02-06	2 weeks-1 month	Compartmental Model	95% Confidence Interval	Mean	4.1192	4.0473	4.1912	y	y	y	y	NA	y	y	y	y	8
61	88	Ulrich Nguemdjo et al.	France	Simulating the progression of the COVID-19 disease in Cameroon using SIR models	PLoS ONE	2020-08-26	Cameroon		Overall	Africa	2020-03-06	2020-04-10	1-2 months	Compartmental Model	95% Confidence Interval	Not specified	1.567	1.536	1.597	y	y	y	y	NA	y	y	y	y	8
62	90	Marino Gatto et al.	Italy	Spread and dynamics of the COVID-19 epidemic in Italy: Effects of emergency containment measures	PNAS	2020-04-23	Italy		Overall	Europe	2020-02-21	2020-03-25	1-2 months	Compartmental Model	95% Credible Interval	Median	3.6	3.49	3.84	y	y	y	y	NA	y	y	y	y	8
63	91	A. Khosravi et al.	Iran	The basic reproduction number and prediction of the epidemic size of the novel coronavirus (COVID-19) in Shahroud, Iran	Epidemiology and Infection	2020-06-04	Iran		Overall	Asia	2020-04-02	2020-05-03	2 weeks-1 month	Others	95% Confidence Interval	Not specified	2.7	2.1	3.4	y	y	y	y	NA	y	y	y	y	8
64	93	Antonio Guirao	Spain	The Covid-19 outbreak in Spain. A simple dynamics model, some lessons, and a theoretical framework for control response	Infectious Disease Modelling	2020-08-06	Germany		Overall	Europe	2020-02-28	2020-03-13	<= 2 weeks	Compartmental Model	95% Confidence Interval	Not specified	2.5	2.3	2.7	y	y	y	y	NA	y	y	y	y	8
64	93	Antonio Guirao	Spain	The Covid-19 outbreak in Spain. A simple dynamics model, some lessons, and a theoretical framework for control response	Infectious Disease Modelling	2020-08-06	Italy		Overall	Europe	2020-02-22	2020-03-08	2 weeks-1 month	Compartmental Model	95% Confidence Interval	Not specified	2.1	2	2.2	y	y	y	y	NA	y	y	y	y	8
64	93	Antonio Guirao	Spain	The Covid-19 outbreak in Spain. A simple dynamics model, some lessons, and a theoretical framework for control response	Infectious Disease Modelling	2020-08-06	Spain		Overall	Europe	2020-03-01	2020-03-15	<= 2 weeks	Compartmental Model	95% Confidence Interval	Not specified	2.5	2.3	2.7	y	y	y	y	NA	y	y	y	y	8
65	96	Kevin Linka et al.	US	The reproduction number of COVID-19 and its correlation with public health interventions	Computational Mechanics	2020-07-07	Austria		Overall	Europe	2020-05-10	2020-06-20	1-2 months	Compartmental Model	Plus, minus	Not specified	4.38	4.02	4.74	y	y	y	y	NA	y	y	y	y	8
65	96	Kevin Linka et al.	US	The reproduction number of COVID-19 and its correlation with public health interventions	Computational Mechanics	2020-07-07	Belgium		Overall	Europe	2020-05-10	2020-06-20	1-2 months	Compartmental Model	Plus, minus	Not specified	5	4.27	5.73	y	y	y	y	NA	y	y	y	y	8
65	96	Kevin Linka et al.	US	The reproduction number of COVID-19 and its correlation with public health interventions	Computational Mechanics	2020-07-07	Bulgaria		Overall	Europe	2020-05-10	2020-06-20	1-2 months	Compartmental Model	Plus, minus	Not specified	1.29	1.25	1.33	y	y	y	y	NA	y	y	y	y	8
65	96	Kevin Linka et al.	US	The reproduction number of COVID-19 and its correlation with public health interventions	Computational Mechanics	2020-07-07	Croatia		Overall	Europe	2020-05-10	2020-06-20	1-2 months	Compartmental Model	Plus, minus	Not specified	0.93	0.71	1.15	y	y	y	y	NA	y	y	y	y	8
65	96	Kevin Linka et al.	US	The reproduction number of COVID-19 and its correlation with public health interventions	Computational Mechanics	2020-07-07	Cyprus		Overall	Asia	2020-05-10	2020-06-20	1-2 months	Compartmental Model	Plus, minus	Not specified	3.35	2.21	4.49	y	y	y	y	NA	y	y	y	y	8
65	96	Kevin Linka et al.	US	The reproduction number of COVID-19 and its correlation with public health interventions	Computational Mechanics	2020-07-07	Czech republic		Overall	Europe	2020-05-10	2020-06-20	1-2 months	Compartmental Model	Plus, minus	Not specified	2.92	2.45	3.39	y	y	y	y	NA	y	y	y	y	8
65	96	Kevin Linka et al.	US	The reproduction number of COVID-19 and its correlation with public health interventions	Computational Mechanics	2020-07-07	Denmark		Overall	Europe	2020-05-10	2020-06-20	1-2 months	Compartmental Model	Plus, minus	Not specified	2	1.95	2.05	y	y	y	y	NA	y	y	y	y	8
65	96	Kevin Linka et al.	US	The reproduction number of COVID-19 and its correlation with public health interventions	Computational Mechanics	2020-07-07	Estonia		Overall	Europe	2020-05-10	2020-06-20	1-2 months	Compartmental Model	Plus, minus	Not specified	3.12	2.34	3.9	y	y	y	y	NA	y	y	y	y	8
65	96	Kevin Linka et al.	US	The reproduction number of COVID-19 and its correlation with public health interventions	Computational Mechanics	2020-07-07	Europe	European Union		Europe	2020-05-10	2020-06-20	1-2 months	Compartmental Model	Plus, minus	Mean	4.22	2.53	5.91	y	y	y	y	NA	y	y	y	y	8
65	96	Kevin Linka et al.	US	The reproduction number of COVID-19 and its correlation with public health interventions	Computational Mechanics	2020-07-07	Finland		Overall	Europe	2020-05-10	2020-06-20	1-2 months	Compartmental Model	Plus, minus	Not specified	1.62	1.57	1.67	y	y	y	y	NA	y	y	y	y	8
65	96	Kevin Linka et al.	US	The reproduction number of COVID-19 and its correlation with public health interventions	Computational Mechanics	2020-07-07	France		Overall	Europe	2020-05-10	2020-06-20	1-2 months	Compartmental Model	Plus, minus	Not specified	3.46	3.17	3.75	y	y	y	y	NA	y	y	y	y	8
65	96	Kevin Linka et al.	US	The reproduction number of COVID-19 and its correlation with public health interventions	Computational Mechanics	2020-07-07	Germany		Overall	Europe	2020-05-10	2020-06-20	1-2 months	Compartmental Model	Plus, minus	Not specified	6.33	5.69	6.97	y	y	y	y	NA	y	y	y	y	8
65	96	Kevin Linka et al.	US	The reproduction number of COVID-19 and its correlation with public health interventions	Computational Mechanics	2020-07-07	Greece		Overall	Europe	2020-05-10	2020-06-20	1-2 months	Compartmental Model	Plus, minus	Not specified	1.66	1.54	1.78	y	y	y	y	NA	y	y	y	y	8
65	96	Kevin Linka et al.	US	The reproduction number of COVID-19 and its correlation with public health interventions	Computational Mechanics	2020-07-07	Hungary		Overall	Europe	2020-05-10	2020-06-20	1-2 months	Compartmental Model	Plus, minus	Not specified	1.97	1.42	2.52	y	y	y	y	NA	y	y	y	y	8
65	96	Kevin Linka et al.	US	The reproduction number of COVID-19 and its correlation with public health interventions	Computational Mechanics	2020-07-07	Ireland		Overall	Europe	2020-05-10	2020-06-20	1-2 months	Compartmental Model	Plus, minus	Not specified	1.94	1.88	2	y	y	y	y	NA	y	y	y	y	8
65	96	Kevin Linka et al.	US	The reproduction number of COVID-19 and its correlation with public health interventions	Computational Mechanics	2020-07-07	Italy		Overall	Europe	2020-05-10	2020-06-20	1-2 months	Compartmental Model	Plus, minus	Not specified	4.25	3.83	4.67	y	y	y	y	NA	y	y	y	y	8
65	96	Kevin Linka et al.	US	The reproduction number of COVID-19 and its correlation with public health interventions	Computational Mechanics	2020-07-07	Latvia		Overall	Europe	2020-05-10	2020-06-20	1-2 months	Compartmental Model	Plus, minus	Not specified	2.5	1.61	3.39	y	y	y	y	NA	y	y	y	y	8
65	96	Kevin Linka et al.	US	The reproduction number of COVID-19 and its correlation with public health interventions	Computational Mechanics	2020-07-07	Lithuania		Overall	Europe	2020-05-10	2020-06-20	1-2 months	Compartmental Model	Plus, minus	Not specified	0.91	0.03	1.79	y	y	y	y	NA	y	y	y	y	8
65	96	Kevin Linka et al.	US	The reproduction number of COVID-19 and its correlation with public health interventions	Computational Mechanics	2020-07-07	Luxembourg		Overall	Europe	2020-05-10	2020-06-20	1-2 months	Compartmental Model	Plus, minus	Not specified	2.42	1.21	3.63	y	y	y	y	NA	y	y	y	y	8
65	96	Kevin Linka et al.	US	The reproduction number of COVID-19 and its correlation with public health interventions	Computational Mechanics	2020-07-07	Malta		Overall	Europe	2020-05-10	2020-06-20	1-2 months	Compartmental Model	Plus, minus	Not specified	2.08	1.94	2.22	y	y	y	y	NA	y	y	y	y	8
65	96	Kevin Linka et al.	US	The reproduction number of COVID-19 and its correlation with public health interventions	Computational Mechanics	2020-07-07	Netherlands		Overall	Europe	2020-05-10	2020-06-20	1-2 months	Compartmental Model	Plus, minus	Not specified	5.88	5	6.76	y	y	y	y	NA	y	y	y	y	8
65	96	Kevin Linka et al.	US	The reproduction number of COVID-19 and its correlation with public health interventions	Computational Mechanics	2020-07-07	Poland		Overall	Europe	2020-05-10	2020-06-20	1-2 months	Compartmental Model	Plus, minus	Not specified	2.62	2.36	2.88	y	y	y	y	NA	y	y	y	y	8
65	96	Kevin Linka et al.	US	The reproduction number of COVID-19 and its correlation with public health interventions	Computational Mechanics	2020-07-07	Portugal		Overall	Europe	2020-05-10	2020-06-20	1-2 months	Compartmental Model	Plus, minus	Not specified	5.1	4.24	5.96	y	y	y	y	NA	y	y	y	y	8
65	96	Kevin Linka et al.	US	The reproduction number of COVID-19 and its correlation with public health interventions	Computational Mechanics	2020-07-07	Romania		Overall	Europe	2020-05-10	2020-06-20	1-2 months	Compartmental Model	Plus, minus	Not specified	6.06	5.22	6.9	y	y	y	y	NA	y	y	y	y	8
65	96	Kevin Linka et al.	US	The reproduction number of COVID-19 and its correlation with public health interventions	Computational Mechanics	2020-07-07	Slovakia		Overall	Europe	2020-05-10	2020-06-20	1-2 months	Compartmental Model	Plus, minus	Not specified	1.46	1.42	1.5	y	y	y	y	NA	y	y	y	y	8
65	96	Kevin Linka et al.	US	The reproduction number of COVID-19 and its correlation with public health interventions	Computational Mechanics	2020-07-07	Slovenia		Overall	Europe	2020-05-10	2020-06-20	1-2 months	Compartmental Model	Plus, minus	Not specified	3.83	2.87	4.79	y	y	y	y	NA	y	y	y	y	8
65	96	Kevin Linka et al.	US	The reproduction number of COVID-19 and its correlation with public health interventions	Computational Mechanics	2020-07-07	Spain		Overall	Europe	2020-05-10	2020-06-20	1-2 months	Compartmental Model	Plus, minus	Not specified	5.19	4.69	5.69	y	y	y	y	NA	y	y	y	y	8
65	96	Kevin Linka et al.	US	The reproduction number of COVID-19 and its correlation with public health interventions	Computational Mechanics	2020-07-07	Sweden		Overall	Europe	2020-05-10	2020-06-20	1-2 months	Compartmental Model	Plus, minus	Not specified	1.89	1.8	1.98	y	y	y	y	NA	y	y	y	y	8
66	97	Mohsin Ali et al.	Pakistan	The role of asymptomatic class, quarantine and isolation in the transmission of COVID-19	Journal of Biological Dynamics	2020-05-08	China	Wuhan	Wuhan	Asia	2020-01-22	2020-04-13	> 2 months	Compartmental Model	95% Confidence Interval	Mean	1.8678	1.36	2.4	y	y	y	y	NA	y	y	y	y	8
67	105	Kangkang Wan et al.	China	When will the battle against novel coronavirus end in Wuhan: A SEIR modeling analysis	Journal of Global Health	2020-04-01	China		Overall	Asia	2020-01-22	2020-02-12	2 weeks-1 month	Compartmental Model	Inter quartile range	Median	1.44	1.4	1.47	y	y	y	y	NA	y	y	y	y	8
68	107	Qingyuan Zhao et al.	UK	Analysis of the epidemic growth of the early 2019-nCoV outbreak using internationally confirmed cases	MedRxiv	2020-02-09	Outside China		Overall		2020-01-01	2020-01-20	2 weeks-1 month	Exponential Growth Model	95% Credible Interval	Mean	5.7	3.4	9.2	y	y	y	y	NA	y	y	y	y	8
69	108	Huijuan Zhou et al.	USA	Characterizing the transmission and identifying the control strategy for COVID-19 through epidemiological modeling	MedRxiv	2020-02-25	China		Overall	Asia	2020-01-21	2020-02-20	2 weeks-1 month	Compartmental Model	95% Confidence Interval	Not specified	5.5	5.3	5.8	y	y	CD	CD	y	y	y	y	y	7
70	111	Zhidong Cao et al.	China	Estimating the effective reproduction number of the 2019-nCoV in China	MedRxiv	2020-01-29	China		Overall	Asia	2019-12-16	2020-01-25	1-2 months	Compartmental Model	95% Confidence Interval	Mean	4.08	3.37	4.77	y	y	y	y	NA	y	y	y	y	8
71	112	Jinghua Li et al.	China	Estimation of the epidemic properties of the 2019 novel coronavirus: A mathematical modeling study	MedRxiv	2020-02-20	China	Wuhan	Wuhan	Asia	2020-01-10	2020-02-08	2 weeks-1 month	Others	95% Confidence Interval	Not specified	5.53	5.19	5.88	y	y	y	y	NA	y	y	y	y	8
71	112	Jinghua Li et al.	China	Estimation of the epidemic properties of the 2019 novel coronavirus: A mathematical modeling study	MedRxiv	2020-02-20	China	Wuhan	Wuhan	Asia	2020-01-10	2020-02-08	2 weeks-1 month	Exponential Growth Model	95% Confidence Interval	Not specified	5.54	5.07	6.06	y	y	y	y	NA	y	y	y	y	8
71	112	Jinghua Li et al.	China	Estimation of the epidemic properties of the 2019 novel coronavirus: A mathematical modeling study	MedRxiv	2020-02-20	China	Wuhan	Wuhan	Asia	2020-01-10	2020-02-08	2 weeks-1 month	Others	95% Confidence Interval	Not specified	5.95	4.96	7.03	y	y	y	y	NA	y	y	y	y	8
71	112	Jinghua Li et al.	China	Estimation of the epidemic properties of the 2019 novel coronavirus: A mathematical modeling study	MedRxiv	2020-02-20	China	Wuhan	Wuhan	Asia	2020-01-10	2020-02-08	2 weeks-1 month	Others	95% Confidence Interval	Not specified	1.68	1.09	2.33	y	y	y	y	NA	y	y	y	y	8
71	112	Jinghua Li et al.	China	Estimation of the epidemic properties of the 2019 novel coronavirus: A mathematical modeling study	MedRxiv	2020-02-20	China	Wuhan	Wuhan	Asia	2020-01-10	2020-02-08	2 weeks-1 month	Compartmental Model	95% Confidence Interval	Not specified	3.55	2.97	4.21	y	y	y	y	NA	y	y	y	y	8
71	112	Jinghua Li et al.	China	Estimation of the epidemic properties of the 2019 novel coronavirus: A mathematical modeling study	MedRxiv	2020-02-20	China	Wuhan	Wuhan	Asia	2020-01-10	2020-02-08	2 weeks-1 month	Others	95% Confidence Interval	Mean	4.38	3.63	5.13	y	y	y	y	NA	y	y	y	y	8
72	113	Biao Tang et al.	China	Estimation of the transmission risk of 2019-nCov and its implication for public health interventions	SSRN Preprint (Journal of Clinical Medicine)	2020-01-27	China		Overall	Asia	2019-12-31	2020-01-22	2 weeks-1 month	Compartmental Model	Range	Mean	6.39	1.66	10	y	y	y	y	y	y	y	y	y	9
72	113	Biao Tang et al.	China	Estimation of the transmission risk of 2019-nCov and its implication for public health interventions	SSRN Preprint (Journal of Clinical Medicine)	2020-01-27	China		Overall	Asia	2019-12-31	2020-01-22	2 weeks-1 month	Compartmental Model	95% Confidence Interval	Mean	6.47	5.71	7.23	y	y	y	y	y	y	y	y	y	9
73	114	Can Zhou	USA	Evaluating new evidence in the early dynamics of the novel coronavirus COVID-19 outbreak in Wuhan, China with real time domestic traffic and potential asymptomatic transmissions	MedRxiv	2020-02-20	China		Overall	Asia	2019-12-31	2020-01-29	2 weeks-1 month	Compartmental Model	95% Confidence Interval	Mean	2.12	2.04	2.18	y	y	y	y	NA	y	y	y	y	8
74	117	Mingwang Shen et al.	China	Modelling the epidemic trend of the 2019 novel coronavirus outbreak in China	BioRxiv	2020-01-25	China		Overall	Asia	2019-12-12	2020-01-22	1-2 months	Compartmental Model	95% Confidence Interval	Not specified	4.71	4.5	4.92	y	y	y	y	y	y	N	y	y	8
75	118	Jonathan M. Read et al.	UK	Novel coronavirus 2019-nCoV: early estimation of epidemiological parameters and epidemic predictions	MedRxiv	2020-01-28	China		Overall	Asia	2020-01-01	2020-01-22	2 weeks-1 month	Compartmental Model	95% Confidence Interval	Not specified	3.11	2.39	4.13	y	y	y	y	y	O	N	y	y	7
76	120	Natsuko Imai et al.	UK	Transmissibility of 2019-nCoV	Report of Imperial College London	2020-01-25	China		Overall	Asia		2020-01-18		Others	Range	Mean	2.6	1.5	3.5	y	y	y	y	NA	y	CD	y	y	7
77	122	Ruiyun Li et al.	UK	Substantial undocumented infection facilitates the rapid dissemination of novel coronavirus (SARS-CoV-2)	Science	2020-05-01	China		Overall	Asia	2020-01-10	2020-01-23	<= 2 weeks	Compartmental Model	95% Credible Interval	Median	2.38	2.03	2.77	y	y	y	y	NA	y	N	y	y	7
78	123	Steven Sanche et al.	USA - 4	The Novel Coronavirus, 2019-nCoV, is Highly Contagious and More Infectious Than Initially Estimated	MedRxiv	2020-02-11	China		Overall	Asia	2020-01-10	2020-01-30	2 weeks-1 month	Exponential Growth Model	95% Confidence Interval	Mean	6.3	3.3	11.3	y	y	y	y	y	y	y	y	y	9
78	123	Steven Sanche et al.	USA - 4	The Novel Coronavirus, 2019-nCoV, is Highly Contagious and More Infectious Than Initially Estimated	MedRxiv	2020-02-11	China		Overall	Asia	2020-01-10	2020-01-30	2 weeks-1 month	Exponential Growth Model	95% Confidence Interval	Mean	4.9	3.3	7.2	y	y	y	y	y	y	y	y	y	9
78	123	Steven Sanche et al.	USA - 4	The Novel Coronavirus, 2019-nCoV, is Highly Contagious and More Infectious Than Initially Estimated	MedRxiv	2020-02-11	China		Overall	Asia	2020-01-10	2020-01-30	2 weeks-1 month	Exponential Growth Model	95% Confidence Interval	Mean	6.6	4	10.5	y	y	y	y	y	y	y	y	y	9
78	123	Steven Sanche et al.	USA - 4	The Novel Coronavirus, 2019-nCoV, is Highly Contagious and More Infectious Than Initially Estimated	MedRxiv	2020-02-11	China		Overall	Asia	2020-01-10	2020-01-30	2 weeks-1 month	Exponential Growth Model	95% Confidence Interval	Mean	4.7	2.8	7.6	y	y	y	y	y	y	y	y	y	9
79	125	Sam Abbott et al.	UK	The transmissibility of novel Coronavirus in the early stages of the 2019-20 outbreak in Wuhan: Exploring initial point- source exposure sizes and durations using scenario analysis	Wellcome Open Research	2020-02-03	China		Overall	Asia	2019-12-31	2020-01-25	2 weeks-1 month	Others	90% Credible Interval	Not specified		2	2.7	y	y	y	y	NA	y	y	y	y	8
79	125	Sam Abbott et al.	UK	The transmissibility of novel Coronavirus in the early stages of the 2019-20 outbreak in Wuhan: Exploring initial point- source exposure sizes and durations using scenario analysis	Wellcome Open Research	2020-02-03	China		Overall	Asia	2019-12-31	2020-01-25	2 weeks-1 month	Others	90% Credible Interval	Not specified		2.8	3.8	y	y	y	y	NA	y	y	y	y	8
80	126	Tao Liu et al.	China	Time-varying transmission dynamics of Novel Coronavirus Pneumonia in China	BioRxiv	2020-02-13	China		Overall	Asia	2019-12-31	2020-02-07	1-2 months	Exponential Growth Model	95% Confidence Interval	Mean	4.5	4.4	4.6	y	y	y	N	y	y	y	y	y	8
81	131	Amjad Salim Shaikh et al.	India	A mathematical model of COVID-19 using fractional derivative: outbreak in India with dynamics of transmission and control	Springer	2020-07-22	India		Overall	Asia	2020-03-14	2020-03-26	<= 2 weeks	Others	Range	Not specified	2.58913	1.4	6.49	y	y	y	y	NA	y	N	y	y	7
