# Supplementary material for: Reliability of Early Estimates of the Basic Reproduction Number of COVID-19: A Systematic Review and Meta-Analysis
Source: Int J Environ Res Public Health. 2022 Sep 15;19(18):11613. doi: 10.3390/ijerph191811613 (PMC9517346; doi:10.3390/ijerph191811613)
Supplement: Supplementary file 1 [file ijerph-19-11613-s001.zip › table S3_ro_narrative.xlsx]

## Sheet: Sheet1
studyCount	study	author	authorAffiliation	title	journal	dateOfPublication	country	city	china	continent	from	to	duration_cat	methodCat	intervalType	meanMedian	ro	roFrom	roTo	Clarityinobjectiveclearly	Studypopulationclearlyandful	Thecasesconsecutive	Thesubjectscomparable	Theinterventionclearlydescrib	Theoutcomemeasuresclearlydef	Thelengthoffollowupadequate	Thestatisticalmethodswelldes	Theresultswelldescribed	totalScore
1	6	Sudhanshu Kumar Biswas et al.	India	COVID-19 pandemic in India: a mathematical model study	Nonlinear Dynamics	2020-09-21	India		Overall	Asia	2020-03-01	2020-04-24	1-2 months	Compartmental Model		Not specified	2.39745			y	y	y	y	NA	y	y	y	N	7
2	9	Cleo Anastassopoulou et al.	Greece, Italy	Data-based analysis, modelling and forecasting of the COVID-19 outbreak	PLoS ONE	2020-03-31	China	Hubei	Hubei	Asia	2020-01-11	2020-02-10	2 weeks-1 month	Compartmental Model		Mean	2			y	y	y	y	NA	y	N	y	y	7
2	9	Cleo Anastassopoulou et al.	Greece, Italy	Data-based analysis, modelling and forecasting of the COVID-19 outbreak	PLoS ONE	2020-03-31	China	Hubei	Hubei	Asia	2020-01-11	2020-02-10	2 weeks-1 month	Compartmental Model		Mean	2.6			y	y	y	y	NA	y	N	y	y	7
3	20	Seo Yoon Chae et al.	South Korea	Estimation of Infection Rate and Predictions of Disease Spreading Based on Initial Individuals Infected With COVID-19	Frontiers in Physics	2020-08-14	USA		Overall	North America	2020-01-21			Compartmental Model		Not specified	3.5			y	y	y	y	NA	y	CD	y	N	6
3	20	Seo Yoon Chae et al.	South Korea	Estimation of Infection Rate and Predictions of Disease Spreading Based on Initial Individuals Infected With COVID-19	Frontiers in Physics	2020-08-14	Germany		Overall	Europe	2020-01-27			Compartmental Model		Not specified	2.9			y	y	y	y	NA	y	CD	y	N	6
3	20	Seo Yoon Chae et al.	South Korea	Estimation of Infection Rate and Predictions of Disease Spreading Based on Initial Individuals Infected With COVID-19	Frontiers in Physics	2020-08-14	Canada		Overall	North America	2020-01-25			Compartmental Model		Not specified	2.7			y	y	y	y	NA	y	CD	y	N	6
3	20	Seo Yoon Chae et al.	South Korea	Estimation of Infection Rate and Predictions of Disease Spreading Based on Initial Individuals Infected With COVID-19	Frontiers in Physics	2020-08-14	UK		Overall	Europe	2020-01-31			Compartmental Model		Not specified	2.6			y	y	y	y	NA	y	CD	y	N	6
3	20	Seo Yoon Chae et al.	South Korea	Estimation of Infection Rate and Predictions of Disease Spreading Based on Initial Individuals Infected With COVID-19	Frontiers in Physics	2020-08-14	Mexico		Overall	North America	2020-02-28			Compartmental Model		Not specified	1.9			y	y	y	y	NA	y	CD	y	N	6
3	20	Seo Yoon Chae et al.	South Korea	Estimation of Infection Rate and Predictions of Disease Spreading Based on Initial Individuals Infected With COVID-19	Frontiers in Physics	2020-08-14	Iran		Overall	Asia	2020-02-19			Compartmental Model		Not specified	1.8			y	y	y	y	NA	y	CD	y	N	6
3	20	Seo Yoon Chae et al.	South Korea	Estimation of Infection Rate and Predictions of Disease Spreading Based on Initial Individuals Infected With COVID-19	Frontiers in Physics	2020-08-14	South Korea		Overall	Asia	2020-01-20			Compartmental Model		Not specified	2.2			y	y	y	y	NA	y	CD	y	N	6
3	20	Seo Yoon Chae et al.	South Korea	Estimation of Infection Rate and Predictions of Disease Spreading Based on Initial Individuals Infected With COVID-19	Frontiers in Physics	2020-08-14	Italy		Overall	Europe	2020-01-31			Compartmental Model		Not specified	2.2			y	y	y	y	NA	y	CD	y	N	6
3	20	Seo Yoon Chae et al.	South Korea	Estimation of Infection Rate and Predictions of Disease Spreading Based on Initial Individuals Infected With COVID-19	Frontiers in Physics	2020-08-14	China	Overall	Overall	Asia	2019-12-31			Compartmental Model		Not specified	2.7			y	y	y	y	NA	y	CD	y	N	6
3	20	Seo Yoon Chae et al.	South Korea	Estimation of Infection Rate and Predictions of Disease Spreading Based on Initial Individuals Infected With COVID-19	Frontiers in Physics	2020-08-14	Brazil		Overall	South America	2020-02-25			Compartmental Model		Not specified	2.1			y	y	y	y	NA	y	CD	y	N	6
3	20	Seo Yoon Chae et al.	South Korea	Estimation of Infection Rate and Predictions of Disease Spreading Based on Initial Individuals Infected With COVID-19	Frontiers in Physics	2020-08-14	Spain		Overall	Europe	2020-01-31			Compartmental Model		Not specified	2.4			y	y	y	y	NA	y	CD	y	N	6
3	20	Seo Yoon Chae et al.	South Korea	Estimation of Infection Rate and Predictions of Disease Spreading Based on Initial Individuals Infected With COVID-19	Frontiers in Physics	2020-08-14	Japan		Overall	Asia	2020-01-16			Compartmental Model		Not specified	1.9			y	y	y	y	NA	y	CD	y	N	6
4	23	Md. Enamul Hoque	Bangladesh	Estimation of the number of a®ected people due to the Covid-19 pandemic using susceptible, infected and recover model	International Journal of Modern Physica C	2020-07-30	China	Overall	Overall	Asia	2020-01-21	2020-04-04	> 2 months	Compartmental Model		Not specified	2.3			y	y	y	y	NA	y	y	y	N	7
4	23	Md. Enamul Hoque	Bangladesh	Estimation of the number of a®ected people due to the Covid-19 pandemic using susceptible, infected and recover model	International Journal of Modern Physica C	2020-07-30	Turkey		Overall	Asia	2020-03-18	2020-04-04	2 weeks-1 month	Compartmental Model		Not specified	14.5			y	y	y	y	NA	y	y	y	N	7
5	30	Sungchan Kim et al.	South Korea	Evaluation of COVID-19 epidemic outbreak caused by temporal contact-increase in South Korea	International Journal of Infectious Diseases	2020-05-09	South Korea		Overall	Asia	2020-01-20	2020-03-15	1-2 months	Compartmental Model		Not specified	1.77			y	y	y	y	NA	y	y	y	N	7
6	31	Longxiang Su et al.	China	Evaluation of the Secondary Transmission Pattern and Epidemic Prediction of COVID-19 in the Four Metropolitan Areas of China	Frontiers in Physics	2020-05-07	China	Shenzhen	Outside Hubei	Asia	2020-01-24	2020-02-23	2 weeks-1 month	Compartmental Model		Not specified	1.75			y	y	y	y	NA	y	y	y	N	7
6	31	Longxiang Su et al.	China	Evaluation of the Secondary Transmission Pattern and Epidemic Prediction of COVID-19 in the Four Metropolitan Areas of China	Frontiers in Physics	2020-05-07	China	Beijing	Outside Hubei	Asia	2020-01-24	2020-02-23	2 weeks-1 month	Compartmental Model		Not specified	2.91			y	y	y	y	NA	y	y	y	N	7
6	31	Longxiang Su et al.	China	Evaluation of the Secondary Transmission Pattern and Epidemic Prediction of COVID-19 in the Four Metropolitan Areas of China	Frontiers in Physics	2020-05-07	China	Shanghai	Outside Hubei	Asia	2020-01-24	2020-02-23	2 weeks-1 month	Compartmental Model		Not specified	2.78			y	y	y	y	NA	y	y	y	N	7
6	31	Longxiang Su et al.	China	Evaluation of the Secondary Transmission Pattern and Epidemic Prediction of COVID-19 in the Four Metropolitan Areas of China	Frontiers in Physics	2020-05-07	China	Guangzhou	Outside Hubei	Asia	2020-01-24	2020-02-23	2 weeks-1 month	Compartmental Model		Not specified	2.02			y	y	y	y	NA	y	y	y	N	7
7	32	Jose Mario Vicensi Grzybowski et al.	Brazil	Expanded SEIRCQ Model Applied to COVID-19 Epidemic Control Strategy Design and Medical Infrastructure Planning	Mathematical Problems in Engineering	2020-08-08	Brazil	Manaus		South America	2020-03-21	2020-04-10	2 weeks-1 month	Compartmental Model		Not specified	3.55			y	y	y	y	NA	y	y	y	N	7
8	35	I Md Ady Wirawan et al.	Indonesia	Forecasting COVID-19 Transmission and Healthcare Capacity in Bali, Indonesia	Journal of Preventive Medicine and Public Health	2020-04-29	Indonesia	Bali		Asia	2020-03-11	2020-04-10	2 weeks-1 month	Compartmental Model		Not specified	1.994			y	y	y	y	NA	y	y	y	N	7
9	36	Subhas Khajanchi et al.	India	Forecasting the daily and cumulative number of cases for the COVID-19 pandemic in India	Chaos	2020-07-08	India	Jharkhand		Asia	2020-03-15	2020-05-24	> 2 months	Compartmental Model		Not specified	1.6877			y	y	y	y	NA	y	y	y	N	7
9	36	Subhas Khajanchi et al.	India	Forecasting the daily and cumulative number of cases for the COVID-19 pandemic in India	Chaos	2020-07-08	India	Gujrat		Asia	2020-03-15	2020-05-24	> 2 months	Compartmental Model		Not specified	1.8803			y	y	y	y	NA	y	y	y	N	7
9	36	Subhas Khajanchi et al.	India	Forecasting the daily and cumulative number of cases for the COVID-19 pandemic in India	Chaos	2020-07-08	India	Chandigarh		Asia	2020-03-15	2020-05-24	> 2 months	Compartmental Model		Not specified	1.4775			y	y	y	y	NA	y	y	y	N	7
9	36	Subhas Khajanchi et al.	India	Forecasting the daily and cumulative number of cases for the COVID-19 pandemic in India	Chaos	2020-07-08	India	Andhra Pradesh		Asia	2020-03-15	2020-05-24	> 2 months	Compartmental Model		Not specified	1.2435			y	y	y	y	NA	y	y	y	N	7
10	37	Abdullah M. Almeshal et al.	Kuwait	Forecasting the Spread of COVID-19 in Kuwait Using Compartmental and Logistic Regression Mode	Applied sciences	2020-05-14	Kuwait		Overall	Asia	2020-02-24	2020-04-19	1-2 months	Compartmental Model		Not specified	2.2			y	y	y	y	NA	y	y	y	N	7
11	39	Gabriel G. Katul et al.	UK, USA	Global convergence of COVID-19 basic reproduction number and estimation from early-time SIR dynamics	PLoS ONE	2020-09-24	Global		Overall		2020-01-15	2020-02-23	1-2 months	Compartmental Model		Not specified	4.5			y	y	y	y	NA	y	y	y	N	7
12	42	Luis Fernando Chaves et al.	Costa Rica	Covid-19 basic reproduction number and assessment of initial suppression policies in costa rica	Mathematical Modelling of Natural Phenomena	2020-05-18	Costa Rica		Overall	North America	2020-02-03	2020-03-03	2 weeks-1 month	Compartmental Model	Mean ± SE	Mean	2.58	0.15	5.01	y	y	y	y	NA	y	y	y	y	8
13	44	Conghui Xu et al.	China, USA	Forecast analysis of the epidemics trend of COVID-19 in the USA by a generalized fractional-order SEIR model	Nonlinear Dynamics	2020-09-14	USA		Overall	North America	2020-01-22	2020-04-20	> 2 months	Compartmental Model		Not specified	0.0289			y	y	y	y	NA	y	y	y	N	7
14	49	SR Patrikar et al.	India	Incubation Period and Reproduction Number for novel coronavirus (COVID-19) infections in India	MedRxiv	2020-06-29	India		Overall	Asia				Others		Median	1.91			y	y	y	y	y	y	NR	y	y	8
14	49	SR Patrikar et al.	India	Incubation Period and Reproduction Number for novel coronavirus (COVID-19) infections in India	MedRxiv	2020-06-29	India		Overall	Asia				Others		Median	2.19			y	y	y	y	y	y	NR	y	y	8
14	49	SR Patrikar et al.	India	Incubation Period and Reproduction Number for novel coronavirus (COVID-19) infections in India	MedRxiv	2020-06-29	India		Overall	Asia				Exponential Growth Model		Median	1.8			y	y	y	y	y	y	NR	y	y	8
14	49	SR Patrikar et al.	India	Incubation Period and Reproduction Number for novel coronavirus (COVID-19) infections in India	MedRxiv	2020-06-29	India		Overall	Asia				Others		Median	1.87			y	y	y	y	y	y	NR	y	y	8
15	53	Tae Wuk Bae et al.	South Korea	Mass Infection Analysis of COVID-19 Using the SEIRD Model in Daegu- Gyeongbuk of Korea from April to May, 2020	Chaos, Solitons and Fractals	2020-08-14	South Korea	Gyeongbuk		Asia	2020-02-22	2020-04-13	1-2 months	Compartmental Model		Not specified	2.6			y	y	y	y	NA	y	y	y	N	7
15	53	Tae Wuk Bae et al.	South Korea	Mass Infection Analysis of COVID-19 Using the SEIRD Model in Daegu- Gyeongbuk of Korea from April to May, 2020	Chaos, Solitons and Fractals	2020-08-14	South Korea	Gyeonggi		Asia	2020-02-21	2020-04-13	1-2 months	Compartmental Model		Not specified	1.3			y	y	y	y	NA	y	y	y	N	7
15	53	Tae Wuk Bae et al.	South Korea	Mass Infection Analysis of COVID-19 Using the SEIRD Model in Daegu- Gyeongbuk of Korea from April to May, 2020	Chaos, Solitons and Fractals	2020-08-14	South Korea	Daegu		Asia	2020-02-19	2020-04-13	1-2 months	Compartmental Model		Not specified	3.7			y	y	y	y	NA	y	y	y	N	7
15	53	Tae Wuk Bae et al.	South Korea	Mass Infection Analysis of COVID-19 Using the SEIRD Model in Daegu- Gyeongbuk of Korea from April to May, 2020	Chaos, Solitons and Fractals	2020-08-14	South Korea	Seoul		Asia	2020-02-20	2020-04-13	1-2 months	Compartmental Model		Not specified	1.5			y	y	y	y	NA	y	y	y	N	7
16	54	Muhammad Naveed et al.	Pakistan, Vietnam, SaudiArabia	Mathematical Analysis of Novel Coronavirus (2019-nCov) Delay Pandemic Model	Computers, Materials & Continua	2020-05-29	NA		Overall					Others		Not specified	0.9985			y	y	y	y	NA	y	NR	N	N	5
17	55	H. M. Yang et al.	Brazil	Mathematical model describing CoViD-19 in São Paulo, Brazil – evaluating isolation as control mechanism and forecasting epidemiological scenarios of release	Epidemiology and Infection	2020-07-03	Brazil	Sao Paulo		South America	2020-02-21	2020-04-02	1-2 months	Compartmental Model		Not specified	6.8			y	y	y	y	NA	y	y	y	N	7
18	57	Shuo Jiang et al.	China - 10, UK - 1	mathematical models for devising the optimal SAR-CoV-2 strategy for eradication in China, South Korea and Italy	Journal of Traslational Medicine	2020-09-05	Italy		Overall	Europe	2020-01-15	2020-03-01	1-2 months	Compartmental Model		Not specified	5.6			y	y	y	y	NA	y	y	y	N	7
18	57	Shuo Jiang et al.	China - 10, UK - 1	mathematical models for devising the optimal SAR-CoV-2 strategy for eradication in China, South Korea and Italy	Journal of Traslational Medicine	2020-09-05	China	Wuhan	Wuhan	Asia	2020-01-15	2020-03-01	1-2 months	Compartmental Model	Range	Not specified		2.98	3.3	y	y	y	y	NA	y	y	y	N	7
18	57	Shuo Jiang et al.	China - 10, UK - 1	mathematical models for devising the optimal SAR-CoV-2 strategy for eradication in China, South Korea and Italy	Journal of Traslational Medicine	2020-09-05	South Korea		Overall	Asia	2020-01-15	2020-03-01	1-2 months	Compartmental Model		Not specified	5.03			y	y	y	y	NA	y	y	y	N	7
18	57	Shuo Jiang et al.	China - 10, UK - 1	Mathematical models for devising the optimal SAR-CoV-2 strategy for eradication in China, South Korea and Italy	Journal of Traslational Medicine	2020-09-05	China	Wuhan	Wuhan	Asia	2020-01-15	2020-03-01	1-2 months	Compartmental Model		Not specified	6.66			y	y	y	y	NA	y	y	y	N	7
19	58	Jingjing Tian et al.	China -2	Modeling analysis of COVID-19 based on morbidity data in Anhui, China	Mathematical Biosciences and Engineering	2020-03-25	China		Overall	Asia	2020-01-10	2020-02-11	1-2 months	Compartmental Model		Not specified	2.9764			y	y	y	y	NA	y	y	y	N	7
20	59	Michael Irvine et al.	Canada -2 USA - 5	Modeling COVID-19 and Its Impacts on U.S. Immigration and Customs Enforcement (ICE) Detention Facilities, 202	Journal of Urban Health	2020-05-15	USA		Overall	North America	2019-10-01	2020-03-02	> 2 months	Compartmental Model		Not specified	2.5			y	y	y	y	NA	y	y	y	N	7
21	60	Philip J Turk et al.	US - 8	Modeling COVID-19 Latent Prevalence to Assess a Public Health Intervention at a State and Regional Scale: Retrospective Cohort Study	JMIR Public Health and Surveillance	2020-04-15	USA		Overall	North America	2020-03-02	2020-04-07	1-2 months	Compartmental Model		Not specified	1.79			y	y	y	y	NA	y	y	y	N	7
22	61	Fernando Saldan ̃a et al.	Mexico -4	Modeling the transmission dynamics and the impact of the control interventions for the COVID-19 epidemic outbreak	Mathematical Biosciences and Engineering	2020-06-15	Mexico		Overall	North America	2020-01-01	2020-02-07	1-2 months	Compartmental Model		Not specified	2.5			y	y	y	y	NA	y	y	y	N	7
23	63	Liping Wang et al.	China - 7	Modelling and assessing the effects of medical resources on transmission of novel coronavirus (COVID-19) in Wuhan, China	Mathematical Biosciences and Engineering	2020-03-30	China		Overall	Asia	2020-01-23	2020-03-06	1-2 months	Others		Not specified	2.71			y	y	y	y	NA	y	y	y	N	7
24	65	Lara Goscé et al.	UK - 5	Modelling SARS-COV2 Spread in London: Approaches to Lift the Lockdown	Journal of Infection	2020-05-24	UK		Overall	Europe	2020-01-31	2020-03-09	1-2 months	Compartmental Model		Not specified	2.56			y	y	y	y	y	y	y	y	N	8
25	70	Kevin Linka et al.	US - 3 Chile - 1	Outbreak dynamics of COVID-19 in Europe and the effect of travel restrictions	Computer Methods Biomechanics and Biomedical Engineering	2020-09-01	Austria		Overall	Europe	2020-01-22	2020-04-13	> 2 months	Compartmental Model		Not specified	8.7			y	y	y	y	NA	y	y	y	N	7
25	70	Kevin Linka et al.	US - 3 Chile - 1	Outbreak dynamics of COVID-19 in Europe and the effect of travel restrictions	Computer Methods Biomechanics and Biomedical Engineering	2020-09-01	Germany		Overall	Europe	2020-01-22	2020-04-13	> 2 months	Compartmental Model		Not specified	6			y	y	y	y	NA	y	y	y	N	7
25	70	Kevin Linka et al.	US - 3 Chile - 1	Outbreak dynamics of COVID-19 in Europe and the effect of travel restrictions	Computer Methods Biomechanics and Biomedical Engineering	2020-09-01	Denmark		Overall	Europe	2020-01-22	2020-04-13	> 2 months	Compartmental Model		Not specified	2.7			y	y	y	y	NA	y	y	y	N	7
25	70	Kevin Linka et al.	US - 3 Chile - 1	Outbreak dynamics of COVID-19 in Europe and the effect of travel restrictions	Computer Methods Biomechanics and Biomedical Engineering	2020-09-01	Malta		Overall	Europe	2020-01-22	2020-04-13	> 2 months	Compartmental Model		Not specified	3			y	y	y	y	NA	y	y	y	N	7
26	71	Soufiane Bentout et al.	Algeria - 2 Japan - 1	Parameter estimation and prediction for coronavirus disease outbreak 2019 (COVID-19) in Algeria	AIMS Public Health	2020-05-22	Algeria		Overall	Africa	2020-02-25	2020-04-18	1-2 months	Compartmental Model		Not specified	4.1			y	y	y	y	NA	y	y	y	N	7
27	75	Z. Liu et al.	China -2 Senegal - 1 USA - 1	Predicting the cumulative number of cases for the COVID-19 epidemic in China from early data	MedRxiv	2020-03-11	China		Overall	Asia	2020-01-19	2020-03-06	1-2 months	Compartmental Model		Not specified	4.16			y	y	y	y	NA	y	y	y	N	7
28	76	Ali Moussaoui et al.	Algeria - 1 France – 1	Prediction of confinement effects on the number of COVID-19 outbreak in Algeria	Mathematical Modelling of Natural Phenomena	2020-06-29	Algeria		Overall	Africa	2020-03-01	2020-04-10	1-2 months	Compartmental Model		Not specified	2.1			y	y	y	y	NA	y	y	y	N	7
29	82	Tao Zhou et al.	China	Preliminary prediction of the basic reproduction number of the Wuhan novel coronavirus 2019-nCoV	Journal of Evidence Based Medicine	2020-01-29	China		Overall	Asia		2020-01-26		Compartmental Model		Not specified	3.22			y	y	y	y	NA	y	CD	y	N	6
29	82	Tao Zhou et al.	China	Preliminary prediction of the basic reproduction number of the Wuhan novel coronavirus 2019-nCoV	Journal of Evidence Based Medicine	2020-01-29	China		Overall	Asia		2020-01-26		Compartmental Model		Not specified	2.83			y	y	y	y	NA	y	CD	y	N	6
29	82	Tao Zhou et al.	China	Preliminary prediction of the basic reproduction number of the Wuhan novel coronavirus 2019-nCoV	Journal of Evidence Based Medicine	2020-01-29	China		Overall	Asia		2020-01-26		Compartmental Model		Not specified	3.78			y	y	y	y	NA	y	CD	y	N	6
29	82	Tao Zhou et al.	China	Preliminary prediction of the basic reproduction number of the Wuhan novel coronavirus 2019-nCoV	Journal of Evidence Based Medicine	2020-01-29	China		Overall	Asia		2020-01-26		Compartmental Model		Not specified	3.28			y	y	y	y	NA	y	CD	y	N	6
29	82	Tao Zhou et al.	China	Preliminary prediction of the basic reproduction number of the Wuhan novel coronavirus 2019-nCoV	Journal of Evidence Based Medicine	2020-01-29	China		Overall	Asia		2020-01-26		Compartmental Model		Not specified	3.34			y	y	y	y	NA	y	CD	y	N	6
29	82	Tao Zhou et al.	China	Preliminary prediction of the basic reproduction number of the Wuhan novel coronavirus 2019-nCoV	Journal of Evidence Based Medicine	2020-01-29	China		Overall	Asia		2020-01-26		Compartmental Model		Not specified	3.93			y	y	y	y	NA	y	CD	y	N	6
30	86	Shelby R. Buckman et l	US	Replicating and projecting the path of COVID-19 with a model-implied reproduction number	Infectious Disease Modelling	2020-08-28	USA		Overall	North America	2020-02-25	2020-07-19	> 2 months	Compartmental Model		Not specified	9.7			y	y	y	y	NA	y	y	y	N	7
30	86	Shelby R. Buckman et l	US	Replicating and projecting the path of COVID-19 with a model-implied reproduction number	Infectious Disease Modelling	2020-08-28	China		Overall	Asia	2020-01-25	2020-07-19	> 2 months	Compartmental Model		Not specified	4.8			y	y	y	y	NA	y	y	y	N	7
30	86	Shelby R. Buckman et l	US	Replicating and projecting the path of COVID-19 with a model-implied reproduction number	Infectious Disease Modelling	2020-08-28	Brazil		Overall	South America	2020-03-01	2020-07-19	> 2 months	Compartmental Model		Not specified	11.4			y	y	y	y	NA	y	y	y	N	7
30	86	Shelby R. Buckman et l	US	Replicating and projecting the path of COVID-19 with a model-implied reproduction number	Infectious Disease Modelling	2020-08-28	Italy		Overall	Europe	2020-02-25	2020-07-19	> 2 months	Compartmental Model		Not specified	6			y	y	y	y	NA	y	y	y	N	7
31	89	Rui Huang et al.	China	Spatial-temporal distribution of COVID-19 in China and its prediction: A data-driven modeling analysis	The Journal of Infection in Developing Countries	2020-03-03	China		Overall	Asia	2020-01-24	2020-02-29	1-2 months	Compartmental Model	Range	Not specified		4.8	5.8	y	y	y	y	NA	y	y	y	y	8
32	92	Marwan Al-Raeei	Syrian Arab Republic	The basic reproduction number of the new coronavirus pandemic with T mortality for India, the Syrian Arab Republic, the United States, Yemen, China, France, Nigeria and Russia with different rate of cases	Clinical Epidemiology and Global Health	2020-08-20	Russia		Overall	Europe		2020-07-30		Compartmental Model		Not specified	1.2952			y	y	y	y	NA	y	CD	y	N	6
32	92	Marwan Al-Raeei	Syrian Arab Republic	The basic reproduction number of the new coronavirus pandemic with T mortality for India, the Syrian Arab Republic, the United States, Yemen, China, France, Nigeria and Russia with different rate of cases	Clinical Epidemiology and Global Health	2020-08-20	USA		Overall	North America		2020-07-30		Compartmental Model		Not specified	1.6135			y	y	y	y	NA	y	CD	y	N	6
32	92	Marwan Al-Raeei	Syrian Arab Republic	The basic reproduction number of the new coronavirus pandemic with T mortality for India, the Syrian Arab Republic, the United States, Yemen, China, France, Nigeria and Russia with different rate of cases	Clinical Epidemiology and Global Health	2020-08-20	Nigeria		Overall	Africa		2020-07-30		Compartmental Model		Not specified	1.0011			y	y	y	y	NA	y	CD	y	N	6
32	92	Marwan Al-Raeei	Syrian Arab Republic	The basic reproduction number of the new coronavirus pandemic with T mortality for India, the Syrian Arab Republic, the United States, Yemen, China, France, Nigeria and Russia with different rate of cases	Clinical Epidemiology and Global Health	2020-08-20	India		Overall	Asia		2020-07-30		Compartmental Model		Not specified	1.2561			y	y	y	y	NA	y	CD	y	N	6
32	92	Marwan Al-Raeei	Syrian Arab Republic	The basic reproduction number of the new coronavirus pandemic with T mortality for India, the Syrian Arab Republic, the United States, Yemen, China, France, Nigeria and Russia with different rate of cases	Clinical Epidemiology and Global Health	2020-08-20	Yemen		Overall	Asia		2020-07-30		Compartmental Model		Not specified	1.4067			y	y	y	y	NA	y	CD	y	N	6
32	92	Marwan Al-Raeei	Syrian Arab Republic	The basic reproduction number of the new coronavirus pandemic with T mortality for India, the Syrian Arab Republic, the United States, Yemen, China, France, Nigeria and Russia with different rate of cases	Clinical Epidemiology and Global Health	2020-08-20	France		Overall	Europe		2020-07-30		Compartmental Model		Not specified	2.7248			y	y	y	y	NA	y	CD	y	N	6
32	92	Marwan Al-Raeei	Syrian Arab Republic	The basic reproduction number of the new coronavirus pandemic with T mortality for India, the Syrian Arab Republic, the United States, Yemen, China, France, Nigeria and Russia with different rate of cases	Clinical Epidemiology and Global Health	2020-08-20	China		Overall	Asia		2020-07-30		Compartmental Model		Not specified	1.7273			y	y	y	y	NA	y	CD	y	N	6
32	92	Marwan Al-Raeei	Syrian Arab Republic	The basic reproduction number of the new coronavirus pandemic with T mortality for India, the Syrian Arab Republic, the United States, Yemen, China, France, Nigeria and Russia with different rate of cases	Clinical Epidemiology and Global Health	2020-08-20	The Syrian Arab Republic		Overall	Asia		2020-07-30		Compartmental Model		Not specified	2.7936			y	y	y	y	NA	y	CD	y	N	6
33	93	Antonio Guirao	Spain	The Covid-19 outbreak in Spain. A simple dynamics model, some lessons, and a theoretical framework for control response	Infectious Disease Modelling	2020-08-06	Spain	Murcia		Europe	2020-03-17	2020-03-25	<= 2 weeks	Compartmental Model		Not specified	2.2			y	y	y	y	NA	y	y	y	N	7
33	93	Antonio Guirao	Spain	The Covid-19 outbreak in Spain. A simple dynamics model, some lessons, and a theoretical framework for control response	Infectious Disease Modelling	2020-08-06	Spain	Madrid		Europe	2020-03-03	2020-03-15	<= 2 weeks	Compartmental Model		Not specified	2.5			y	y	y	y	NA	y	y	y	N	7
33	93	Antonio Guirao	Spain	The Covid-19 outbreak in Spain. A simple dynamics model, some lessons, and a theoretical framework for control response	Infectious Disease Modelling	2020-08-06	Spain	Catalonia		Europe	2020-03-10	2020-03-15	<= 2 weeks	Compartmental Model		Not specified	2.5			y	y	y	y	NA	y	y	y	N	7
34	94	Omar El Deeb et al.	Lebanon	The dynamics of COVID-19 spread: evidence from Lebanon	Mathematical Biosciences and Engineering	2020-08-19	Lebanon		Overall	Asia	2020-02-21	2020-06-20	> 2 months	Compartmental Model		Not specified	5.6			y	y	y	y	NA	y	y	y	y	8
35	95	Muhammad Altaf Khan et al.	Indonesia	The dynamics of COVID-19 with quarantined and isolation	Advances in Difference Equations	2020-08-14	China		Overall	Asia	2020-01-11	2020-04-09	> 2 months	Others		Not specified	6.6361			y	y	y	y	NA	y	y	y	y	8
36	98	Chentong Li et al.	China	The within-host viral kinetics of SARS-CoV-2	BioRxiv	2020-03-07	China		Overall	Asia		2020-03-03		Others		Mean	3.79			y	y	y	y	NA	y	CD	y	y	7
37	100	Muhammad Dur-e-Ahmad et al.	Canada	Transmission Dynamics Model of Coronavirus COVID-19 for the Outbreak in Most Affected Countries of the World	IJIMAI journal	2020-04-02	South Korea		Overall	Asia	2020-01-23	2020-03-05	1-2 months	Compartmental Model		Not specified	2.8931			y	y	y	y	NA	y	y	y	N	7
37	100	Muhammad Dur-e-Ahmad et al.	Canada	Transmission Dynamics Model of Coronavirus COVID-19 for the Outbreak in Most Affected Countries of the World	IJIMAI journal	2020-04-02	China		Overall	Asia	2020-01-23	2020-03-05	1-2 months	Compartmental Model		Not specified	2.7999			y	y	y	y	NA	y	y	y	N	7
37	100	Muhammad Dur-e-Ahmad et al.	Canada	Transmission Dynamics Model of Coronavirus COVID-19 for the Outbreak in Most Affected Countries of the World	IJIMAI journal	2020-04-02	Iran		Overall	Asia	2020-01-23	2020-03-05	1-2 months	Compartmental Model		Not specified	2.7537			y	y	y	y	NA	y	y	y	N	7
37	100	Muhammad Dur-e-Ahmad et al.	Canada	Transmission Dynamics Model of Coronavirus COVID-19 for the Outbreak in Most Affected Countries of the World	IJIMAI journal	2020-04-02	Italy		Overall	Europe	2020-01-23	2020-03-05	1-2 months	Compartmental Model		Not specified	2.7875			y	y	y	y	NA	y	y	y	N	7
38	101	Konstantin S. Sharov	Russia	Trends in adaptation of fifteen European countries population to SARS-CoV-2 in MarcheMay 2020: Can Taiwanese experience be adopted?	Journal of the Formosan Meidcal Association	2020-07-28	Europe		Overall	Europe	2020-03-02	2020-05-22	> 2 months	Compartmental Model		Not specified	5.539			y	y	y	y	NA	y	y	y	N	7
39	102	Rams ́es H Mena et al.	Mexico	Using posterior predictive distributions to analyse epidemic models: COVID-19 in Mexico City	Physical Biology	2020-09-15	Mexico		Overall	North America	2020-02-27	2020-06-18	> 2 months	Compartmental Model		Not specified	3.26			y	y	y	y	NA	y	y	y	N	7
40	103	Feng Liu et al.	China	Using the contact network model and Metropolis-Hastings sampling to reconstruct the COVID-19 spread on the ‘‘Diamond Princess”	Science Bulletin	2020-05-05	Japan		Overall	Asia	2020-01-20	2020-02-19	2 weeks-1 month	Others		Not specified	6.94			y	y	y	y	NA	y	y	y	N	7
41	104	Haitao Song et al.	China	Using traveller-derived cases in Henan Province to quantify the spread of COVID-19 in Wuhan, China	Nonlinear Dynamics	2020-07-29	China		Overall	Asia	2020-01-04	2020-01-23	2 weeks-1 month	Compartmental Model		Not specified	6.35			y	y	y	y	NA	y	y	y	N	7
41	104	Haitao Song et al.	China	Using traveller-derived cases in Henan Province to quantify the spread of COVID-19 in Wuhan, China	Nonlinear Dynamics	2020-07-29	China		Overall	Asia	2020-01-04	2020-01-23	2 weeks-1 month	Compartmental Model		Not specified	7.53			y	y	y	y	NA	y	y	y	N	7
41	104	Haitao Song et al.	China	Using traveller-derived cases in Henan Province to quantify the spread of COVID-19 in Wuhan, China	Nonlinear Dynamics	2020-07-29	China		Overall	Asia	2020-01-04	2020-01-23	2 weeks-1 month	Compartmental Model		Not specified	6.27			y	y	y	y	NA	y	y	y	N	7
42	106	Jun Li	China	A Robust Stochastic Method of Estimating the Transmission Potential of 2019-nCoV	ArXiv	2020-02-07	China		Overall	Asia	2020-01-01	2020-02-05	1-2 months	Compartmental Model		Not specified	4.76			y	y	y	y	NA	y	y	y	y	8
43	110	Yuxiao Bai et al.	China	Epidemic Prediction of 2019-nCoV in Hubei Province and Comparison with SARS in Guangdong Province	SSRN Preprint	2020-02-04	China		Overall	Asia	2020-01-19	2020-01-27	<= 2 weeks	Compartmental Model		Not specified	1.49			y	y	y	y	NA	y	N	y	N	6
44	115	Zhidong Cao et al.	China	Incorporating Human Movement Data to Improv	MedRxiv	2020-02-09	China		Overall	Asia	2020-01-01	2020-01-22	2 weeks-1 month	Compartmental Model		Not specified	3.24			y	y	y	y	NA	y	y	y	N	7
45	116	B. Ivorra et al.	Spain	Mathematical modeling of the spread of the coronavirus disease 2019 (COVID-19) taking into account the undetected infections. The case of China	Communications in Nonlinear Science and Numerical Simulation	2020-04-30	China		Overall	Asia	2019-12-01	2020-03-29	> 2 months	Compartmental Model		Not specified	4.273			y	y	y	y	NA	y	y	y	N	7
46	121	Hao Xiong et al.	China	Simulating the infected population and spread trend of 2019-nCov under different policy by EIR model	SSRN Preprint	2020-02-13	China		Overall	Asia	2019-12-01	2020-02-07	> 2 months	Compartmental Model		Not specified	2.985			y	y	y	y	y	y	y	y	N	8
47	124	Nian Shao et al.	China	The reproductive number R0 of COVID-19 based on estimate of a statistical time delay dynamical system	MedRxiv	2020-02-20	China	Beijing	Outside Hubei	Asia		2020-02-16		Others		Not specified	3.259			y	y	y	y	NA	y	CD	y	N	6
47	124	Nian Shao et al.	China	The reproductive number R0 of COVID-19 based on estimate of a statistical time delay dynamical system	MedRxiv	2020-02-20	China	Shanghai	Outside Hubei	Asia		2020-02-16		Others		Not specified	3.2462			y	y	y	y	NA	y	CD	y	N	6
47	124	Nian Shao et al.	China	The reproductive number R0 of COVID-19 based on estimate of a statistical time delay dynamical system	MedRxiv	2020-02-20	China	Without Hubei	Outside Hubei	Asia		2020-02-16		Others		Not specified	3.04			y	y	y	y	NA	y	CD	y	N	6
47	124	Nian Shao et al.	China	The reproductive number R0 of COVID-19 based on estimate of a statistical time delay dynamical system	MedRxiv	2020-02-20	China	Wuhan	Wuhan	Asia		2020-02-16		Others		Not specified	3.1225			y	y	y	y	NA	y	CD	y	N	6
47	124	Nian Shao et al.	China	The reproductive number R0 of COVID-19 based on estimate of a statistical time delay dynamical system	MedRxiv	2020-02-20	China	Hubei (Without Wuhan)	Hubei	Asia		2020-02-16		Others		Not specified	3.019			y	y	y	y	NA	y	CD	y	N	6
48	126	Henrique Mohallem Paiva et al.	Sao Paulo, Brazil	A data-driven model to describe and forecast the dynamics of COVID-19 transmission	PLoS ONE	2020-07-31	Spain		Overall	Europe	2020-03-06	2020-05-19	> 2 months	Compartmental Model		Not specified	2.09			y	y	y	N	y	y	y	y	y	8
48	126	Henrique Mohallem Paiva et al.	Sao Paulo, Brazil	A data-driven model to describe and forecast the dynamics of COVID-19 transmission	PLoS ONE	2020-07-31	France		Overall	Europe	2020-03-07	2020-05-20	> 2 months	Compartmental Model		Not specified	1.98			y	y	y	N	y	y	y	y	y	8
48	126	Henrique Mohallem Paiva et al.	Sao Paulo, Brazil	A data-driven model to describe and forecast the dynamics of COVID-19 transmission	PLoS ONE	2020-07-31	China		Overall	Asia	2020-01-22	2020-03-21	1-2 months	Compartmental Model		Not specified	1.62			y	y	y	N	y	y	y	y	y	8
48	126	Henrique Mohallem Paiva et al.	Sao Paulo, Brazil	A data-driven model to describe and forecast the dynamics of COVID-19 transmission	PLoS ONE	2020-07-31	Italy		Overall	Europe	2020-02-28	2020-05-12	> 2 months	Compartmental Model		Not specified	2			y	y	y	N	y	y	y	y	y	8
48	126	Henrique Mohallem Paiva et al.	Sao Paulo, Brazil	A data-driven model to describe and forecast the dynamics of COVID-19 transmission	PLoS ONE	2020-07-31	Germany		Overall	Europe	2020-03-07	2020-05-20	> 2 months	Compartmental Model		Not specified	2.47			y	y	y	N	y	y	y	y	y	8
48	126	Henrique Mohallem Paiva et al.	Sao Paulo, Brazil	A data-driven model to describe and forecast the dynamics of COVID-19 transmission	PLoS ONE	2020-07-31	USA		Overall	North America	2020-03-09	2020-06-19	> 2 months	Compartmental Model		Not specified	2.9			y	y	y	N	y	y	y	y	y	8
49	127	Sha He et al.	China	A discrete stochastic model of the COVID-19 outbreak: Forecast and control	Mathematical Biosciences and Engineering	2020-03-16	China		Overall	Asia	2020-01-11	2020-02-13	1-2 months	Compartmental Model		Not specified	6.96			y	y	y	y	y	y	y	y	N	8
50	128	Zhenzhen Lu et al.	People’s Republic of China	A fractional-order SEIHDR model for COVID-19 with inter-city networked coupling effects	Springer Netherlands	2020-08-05	China	Huanggang	Outside Hubei	Asia	2020-01-23	2020-03-18	1-2 months	Compartmental Model		Not specified	0.9568			y	y	y	y	NA	y	y	y	N	7
50	128	Zhenzhen Lu et al.	People’s Republic of China	A fractional-order SEIHDR model for COVID-19 with inter-city networked coupling effects	Springer Netherlands	2020-08-05	China	Wuhan	Wuhan	Asia	2020-01-23	2020-03-18	1-2 months	Compartmental Model		Not specified	1.2675			y	y	y	y	NA	y	y	y	N	7
50	128	Zhenzhen Lu et al.	People’s Republic of China	A fractional-order SEIHDR model for COVID-19 with inter-city networked coupling effects	Springer Netherlands	2020-08-05	USA		Overall	North America	2020-01-23	2020-03-18	1-2 months	Compartmental Model		Not specified	1.1443			y	y	y	y	NA	y	y	y	N	7
50	128	Zhenzhen Lu et al.	People’s Republic of China	A fractional-order SEIHDR model for COVID-19 with inter-city networked coupling effects	Springer Netherlands	2020-08-05	Japan		Overall	Asia	2020-01-23	2020-03-18	1-2 months	Compartmental Model		Not specified	1.6346			y	y	y	y	NA	y	y	y	N	7
50	128	Zhenzhen Lu et al.	People’s Republic of China	A fractional-order SEIHDR model for COVID-19 with inter-city networked coupling effects	Springer Netherlands	2020-08-05	China	Beijing	Outside Hubei	Asia	2020-01-23	2020-03-18	1-2 months	Compartmental Model		Not specified	0.8855			y	y	y	y	NA	y	y	y	N	7
50	128	Zhenzhen Lu et al.	People’s Republic of China	A fractional-order SEIHDR model for COVID-19 with inter-city networked coupling effects	Springer Netherlands	2020-08-05	Italy		Overall	Europe	2020-01-23	2020-03-18	1-2 months	Compartmental Model		Not specified	1336.8			y	y	y	y	NA	y	y	y	N	7
50	128	Zhenzhen Lu et al.	People’s Republic of China	A fractional-order SEIHDR model for COVID-19 with inter-city networked coupling effects	Springer Netherlands	2020-08-05	China	Shanghai	Outside Hubei	Asia	2020-01-23	2020-03-18	1-2 months	Compartmental Model		Not specified	0.8833			y	y	y	y	NA	y	y	y	N	7
50	128	Zhenzhen Lu et al.	People’s Republic of China	A fractional-order SEIHDR model for COVID-19 with inter-city networked coupling effects	Springer Netherlands	2020-08-05	China	Hubei	Hubei	Asia	2020-01-23	2020-03-18	1-2 months	Compartmental Model		Not specified	0.9848			y	y	y	y	NA	y	y	y	N	7
51	129	Tian-Mu Chen et al.	People’s Republic of China	A mathematical model for simulating the phase-based transmissibility of a novel coronavirus	Infectious Diseases of Poverty	2020-02-28	China	Wuhan	Wuhan	Asia	2019-12-07	2020-01-01	2 weeks-1 month	Others		Not specified	2.3			y	y	y	y	NA	y	y	y	N	7
51	129	Tian-Mu Chen et al.	People’s Republic of China	A mathematical model for simulating the phase-based transmissibility of a novel coronavirus	Infectious Diseases of Poverty	2020-02-28	China	Wuhan	Wuhan	Asia	2019-12-07	2020-01-01	2 weeks-1 month	Others		Not specified	3.58			y	y	y	y	NA	y	y	y	N	7
52	130	Chayu Yang et al.	USA	A mathematical model for the novel coronavirus epidemic in Wuhan, China	Mathematical Biosciences and Engineering	2020-03-11	China	Wuhan	Wuhan	Asia	2020-01-23	2020-02-10	2 weeks-1 month	Compartmental Model		Not specified	4.25			y	y	y	y	NA	y	y	y	N	7
53	132	Zongo P et al.	Martinique, France	A model of COVID-19 transmission to understand the effectiveness of the containment measures: application to data from France	Epidemiology and Infection	2020-08-27	France		Overall	Europe	2020-02-25	2020-03-17	2 weeks-1 month	Compartmental Model		Not specified	4.8739			y	y	y	y	NA	y	y	y	N	7
54	133	Manotosh Mandal et al.	West Bengal, India	A model based study on the dynamics of COVID-19: Prediction and control	Elsevier	2020-05-13	India		Overall	Asia	2020-03-02	2020-04-27	1-2 months	Compartmental Model		Not specified				y	y	y	y	NA	y	y	y	N	7
55	134	José M. Carcione et al. ,	Italy	A Simulation of a COVID-19 Epidemic Based on a Deterministic SEIR Model	Frontiers in Public Health	2020-05-28	Italy	Lombardy		Europe	2020-03-02	2020-04-27	1-2 months	Compartmental Model		Not specified	3			y	y	y	y	y	y	y	y	N	8
56	135	Hanen Ben Hassen et al.	Tunisia	A SIR‑Poisson Model for COVID‑19: Evolution and Transmission Inference in the Maghreb Central Regions	Springer Berlin Heidelberg	2020-07-12	Morocco		Overall	Africa	2020-03-03	2020-04-29	1-2 months	Compartmental Model		Mean	2.92			y	y	y	y	NA	y	y	y	y	8
56	135	Hanen Ben Hassen et al.	Tunisia	A SIR‑Poisson Model for COVID‑19: Evolution and Transmission Inference in the Maghreb Central Regions	Springer Berlin Heidelberg	2020-07-12	Tunisia		Overall	Africa	2020-03-03	2020-04-29	1-2 months	Compartmental Model		Mean	2			y	y	y	y	NA	y	y	y	y	8
56	135	Hanen Ben Hassen et al.	Tunisia	A SIR‑Poisson Model for COVID‑19: Evolution and Transmission Inference in the Maghreb Central Regions	Springer Berlin Heidelberg	2020-07-12	Algeria		Overall	Africa	2020-02-25	2020-04-29	> 2 months	Compartmental Model		Mean	2.66			y	y	y	y	NA	y	y	y	y	8
57	136	Mohsin Ali et al.	Pakistan	Analysis and prediction of the COVID-19 outbreak in Pakistan	Journal of Biological Dynamics	2020-08-08	Pakistan		Overall	Asia	2020-03-16	2020-04-06	2 weeks-1 month	Compartmental Model		Not specified	1.07			y	y	y	y	NA	y	y	y	N	7
58	137	Youcef Belgaid et al.	Algeria	Analysis of a Model for Coronavirus Spread	Mathematics	2020-05-19	Italy		Overall	Europe	2020-01-29	2020-03-28	1-2 months	Compartmental Model		Not specified	3.1402			y	y	y	y	NA	y	y	y	N	7
59	138	W. E. Fitzgibbon et al.	USA	Analysis of a Reaction-Diffusion Epidemic Model with Asymptomatic Transmission.	Journal of Biological Systems	2020-06-16	Brazil		Overall	South America	2020-03-17	2020-05-30	> 2 months	Compartmental Model		Not specified	1.41			y	y	y	y	NA	y	y	y	N	7
60	139	Yong Li	China	Basic reproduction number and predicted trends of coronavirus disease 2019 epidemic in the mainland of China	Infectious Diseases of Poverty	2020-07-16	China	Mainland	Overall	Asia	2020-01-23	2020-01-26	<= 2 weeks	Compartmental Model		Not specified	6.6037			y	y	y	y	y	y	N	y	N	7
60	139	Yong Li	China	Basic reproduction number and predicted trends of coronavirus disease 2019 epidemic in the mainland of China	Infectious Diseases of Poverty	2020-07-16	China	Mainland	Overall	Asia	2020-01-11	2020-01-22	<= 2 weeks	Compartmental Model		Not specified	5.6015			y	y	y	y	y	y	N	y	N	7
61	140	Chinwendu E. Madubueze et al	Nigeria	Controlling the Spread of COVID-19: Optimal Control Analysis	Computational and Mathematical Methods in Medicine	2020-09-17	NA		Overall					Compartmental Model		Not specified	1.51			y	y	NA	y	NA	y	NA	y	N	5
61	140	Chinwendu E. Madubueze et al	Nigeria	Controlling the Spread of COVID-19: Optimal Control Analysis	Computational and Mathematical Methods in Medicine	2020-09-17	NA		Overall					Compartmental Model		Not specified	2.5			y	y	NA	y	NA	y	NA	y	N	5
62	141	I. A. Lakman et al.	Russia	COVID‑19 mathematical forecasting in the Russian Federation	Arterial Hypertension (Russian Federation)	2020-06-04	Russia		Overall	Europe	2020-03-23	2020-05-10	1-2 months	Compartmental Model		Not specified	2.9			y	y	y	y	NA	y	y	y	N	7
63	142	Salih Djilali et al.	Algeria, Iran, Turkey	Coronavirus pandemic: A predictive analysis of the peak outbreak epidemic in South Africa, Turkey, and Brazil	Elsevier	2020-06-05	Brazil		Overall	South America	2020-04-15	2020-04-23	<= 2 weeks	Compartmental Model		Not specified	1.8882			y	y	y	y	NA	y	N	y	N	6
63	142	Salih Djilali et al.	Algeria, Iran, Turkey	Coronavirus pandemic: A predictive analysis of the peak outbreak epidemic in South Africa, Turkey, and Brazil	Elsevier	2020-06-05	South Africa		Overall	Africa	2020-04-15	2020-04-23	<= 2 weeks	Compartmental Model		Not specified	1.6685			y	y	y	y	NA	y	N	y	N	6
63	142	Salih Djilali et al.	Algeria, Iran, Turkey	Coronavirus pandemic: A predictive analysis of the peak outbreak epidemic in South Africa, Turkey, and Brazil	Elsevier	2020-06-05	Turkey		Overall	Asia	2020-04-15	2020-04-23	<= 2 weeks	Compartmental Model		Not specified	1.9184			y	y	y	y	NA	y	N	y	N	6
64	143	J Rocklöv et al.	Sweden	COVID-19 outbreak on the Diamond Princess cruise ship: estimating the epidemic potential and effectiveness of public health countermeasures	Journal of Travel Medicine	2020-02-28	Diamond Princess Cruiseship		Overall		2020-01-21	2020-02-19	2 weeks-1 month	Compartmental Model		Not specified	14.8			y	y	y	y	NA	y	y	y	N	7
65	144	Cosimo Distante et al.	Italy	Covid-19 outbreak progression in italian regions: Approaching the peak by the end of march in northern Italy and first week of april in southern Italy	International Journal of Environmental Research and Public Health	2020-04-27	Italy	Umbria		Europe	2020-01-31	2020-03-29	1-2 months	Exponential Growth Model	Minimum, maximum	Mean			2.16	y	y	y	y	NA	y	y	y	y	8
65	144	Cosimo Distante et al.	Italy	Covid-19 outbreak progression in italian regions: Approaching the peak by the end of march in northern Italy and first week of april in southern Italy	International Journal of Environmental Research and Public Health	2020-04-27	Italy	Abruzzo		Europe	2020-01-31	2020-03-29	1-2 months	Exponential Growth Model		Mean	3.03			y	y	y	y	NA	y	y	y	y	8
65	144	Cosimo Distante et al.	Italy	Covid-19 outbreak progression in italian regions: Approaching the peak by the end of march in northern Italy and first week of april in southern Italy	International Journal of Environmental Research and Public Health	2020-04-27	Italy	Veneto		Europe	2020-01-31	2020-03-29	1-2 months	Exponential Growth Model	Minimum, maximum	Mean		2.6	3.64	y	y	y	y	NA	y	y	y	y	8
65	144	Cosimo Distante et al.	Italy	Covid-19 outbreak progression in italian regions: Approaching the peak by the end of march in northern Italy and first week of april in southern Italy	International Journal of Environmental Research and Public Health	2020-04-27	Italy	Liguria		Europe	2020-01-31	2020-03-29	1-2 months	Exponential Growth Model		Mean	3.1			y	y	y	y	NA	y	y	y	y	8
65	144	Cosimo Distante et al.	Italy	Covid-19 outbreak progression in italian regions: Approaching the peak by the end of march in northern Italy and first week of april in southern Italy	International Journal of Environmental Research and Public Health	2020-04-27	Italy	Lazio		Europe	2020-01-31	2020-03-29	1-2 months	Exponential Growth Model		Mean	3.11			y	y	y	y	NA	y	y	y	y	8
65	144	Cosimo Distante et al.	Italy	Covid-19 outbreak progression in italian regions: Approaching the peak by the end of march in northern Italy and first week of april in southern Italy	International Journal of Environmental Research and Public Health	2020-04-27	Italy	Piedmont		Europe	2020-01-31	2020-03-29	1-2 months	Exponential Growth Model	Minimum, maximum	Mean		2.36	2.98	y	y	y	y	NA	y	y	y	y	8
65	144	Cosimo Distante et al.	Italy	Covid-19 outbreak progression in italian regions: Approaching the peak by the end of march in northern Italy and first week of april in southern Italy	International Journal of Environmental Research and Public Health	2020-04-27	Italy	Apulia		Europe	2020-01-31	2020-03-29	1-2 months	Exponential Growth Model		Mean	3.11			y	y	y	y	NA	y	y	y	y	8
65	144	Cosimo Distante et al.	Italy	Covid-19 outbreak progression in italian regions: Approaching the peak by the end of march in northern Italy and first week of april in southern Italy	International Journal of Environmental Research and Public Health	2020-04-27	Italy	Valle d’Aosta		Europe	2020-01-31	2020-03-29	1-2 months	Exponential Growth Model	Minimum, maximum	Mean		1.57	2.11	y	y	y	y	NA	y	y	y	y	8
65	144	Cosimo Distante et al.	Italy	Covid-19 outbreak progression in italian regions: Approaching the peak by the end of march in northern Italy and first week of april in southern Italy	International Journal of Environmental Research and Public Health	2020-04-27	Italy	Valle d’Aosta		Europe	2020-01-31	2020-03-29	1-2 months	Exponential Growth Model		Mean	2.95			y	y	y	y	NA	y	y	y	y	8
65	144	Cosimo Distante et al.	Italy	Covid-19 outbreak progression in italian regions: Approaching the peak by the end of march in northern Italy and first week of april in southern Italy	International Journal of Environmental Research and Public Health	2020-04-27	Italy	Campania		Europe	2020-01-31	2020-03-29	1-2 months	Exponential Growth Model		Mean	3.14			y	y	y	y	NA	y	y	y	y	8
65	144	Cosimo Distante et al.	Italy	Covid-19 outbreak progression in italian regions: Approaching the peak by the end of march in northern Italy and first week of april in southern Italy	International Journal of Environmental Research and Public Health	2020-04-27	Italy	Apulia		Europe	2020-01-31	2020-03-29	1-2 months	Exponential Growth Model	Minimum, maximum	Mean		1	2.32	y	y	y	y	NA	y	y	y	y	8
65	144	Cosimo Distante et al.	Italy	Covid-19 outbreak progression in italian regions: Approaching the peak by the end of march in northern Italy and first week of april in southern Italy	International Journal of Environmental Research and Public Health	2020-04-27	Italy	Sicily		Europe	2020-01-31	2020-03-29	1-2 months	Exponential Growth Model		Mean	2.99			y	y	y	y	NA	y	y	y	y	8
65	144	Cosimo Distante et al.	Italy	Covid-19 outbreak progression in italian regions: Approaching the peak by the end of march in northern Italy and first week of april in southern Italy	International Journal of Environmental Research and Public Health	2020-04-27	Italy	Veneto		Europe	2020-01-31	2020-03-29	1-2 months	Exponential Growth Model	Minimum, maximum	Mean		2.6	3.64	y	y	y	y	NA	y	y	y	y	8
65	144	Cosimo Distante et al.	Italy	Covid-19 outbreak progression in italian regions: Approaching the peak by the end of march in northern Italy and first week of april in southern Italy	International Journal of Environmental Research and Public Health	2020-04-27	Italy	Basilicata		Europe	2020-01-31	2020-03-29	1-2 months	Exponential Growth Model		Mean	2.66			y	y	y	y	NA	y	y	y	y	8
65	144	Cosimo Distante et al.	Italy	Covid-19 outbreak progression in italian regions: Approaching the peak by the end of march in northern Italy and first week of april in southern Italy	International Journal of Environmental Research and Public Health	2020-04-27	Italy	Emilia Romagna		Europe	2020-01-31	2020-03-29	1-2 months	Exponential Growth Model		Mean	3.38			y	y	y	y	NA	y	y	y	y	8
65	144	Cosimo Distante et al.	Italy	Covid-19 outbreak progression in italian regions: Approaching the peak by the end of march in northern Italy and first week of april in southern Italy	International Journal of Environmental Research and Public Health	2020-04-27	Italy	Veneto		Europe	2020-01-31	2020-03-29	1-2 months	Exponential Growth Model		Mean	3.32			y	y	y	y	NA	y	y	y	y	8
65	144	Cosimo Distante et al.	Italy	Covid-19 outbreak progression in italian regions: Approaching the peak by the end of march in northern Italy and first week of april in southern Italy	International Journal of Environmental Research and Public Health	2020-04-27	Italy	Sardinia		Europe	2020-01-31	2020-03-29	1-2 months	Exponential Growth Model		Mean	3			y	y	y	y	NA	y	y	y	y	8
65	144	Cosimo Distante et al.	Italy	Covid-19 outbreak progression in italian regions: Approaching the peak by the end of march in northern Italy and first week of april in southern Italy	International Journal of Environmental Research and Public Health	2020-04-27	Italy	Campania		Europe	2020-01-31	2020-03-29	1-2 months	Exponential Growth Model	Minimum, maximum	Mean		1.62	2.44	y	y	y	y	NA	y	y	y	y	8
65	144	Cosimo Distante et al.	Italy	Covid-19 outbreak progression in italian regions: Approaching the peak by the end of march in northern Italy and first week of april in southern Italy	International Journal of Environmental Research and Public Health	2020-04-27	Italy	FVG		Europe	2020-01-31	2020-03-29	1-2 months	Exponential Growth Model		Mean	3.04			y	y	y	y	NA	y	y	y	y	8
65	144	Cosimo Distante et al.	Italy	Covid-19 outbreak progression in italian regions: Approaching the peak by the end of march in northern Italy and first week of april in southern Italy	International Journal of Environmental Research and Public Health	2020-04-27	Italy	Lombardy		Europe	2020-01-31	2020-03-29	1-2 months	Exponential Growth Model	Minimum, maximum	Mean		2.94	4.27	y	y	y	y	NA	y	y	y	y	8
65	144	Cosimo Distante et al.	Italy	Covid-19 outbreak progression in italian regions: Approaching the peak by the end of march in northern Italy and first week of april in southern Italy	International Journal of Environmental Research and Public Health	2020-04-27	Italy	PA Trento		Europe	2020-01-31	2020-03-29	1-2 months	Exponential Growth Model	Minimum, maximum	Mean		1	2.38	y	y	y	y	NA	y	y	y	y	8
65	144	Cosimo Distante et al.	Italy	Covid-19 outbreak progression in italian regions: Approaching the peak by the end of march in northern Italy and first week of april in southern Italy	International Journal of Environmental Research and Public Health	2020-04-27	Italy	Liguria		Europe	2020-01-31	2020-03-29	1-2 months	Exponential Growth Model	Minimum, maximum	Mean		2.02	2.47	y	y	y	y	NA	y	y	y	y	8
65	144	Cosimo Distante et al.	Italy	Covid-19 outbreak progression in italian regions: Approaching the peak by the end of march in northern Italy and first week of april in southern Italy	International Journal of Environmental Research and Public Health	2020-04-27	Italy	PA Bolzano		Europe	2020-01-31	2020-03-29	1-2 months	Exponential Growth Model		Mean	2.9			y	y	y	y	NA	y	y	y	y	8
65	144	Cosimo Distante et al.	Italy	Covid-19 outbreak progression in italian regions: Approaching the peak by the end of march in northern Italy and first week of april in southern Italy	International Journal of Environmental Research and Public Health	2020-04-27	Italy	PA Bolzano		Europe	2020-01-31	2020-03-29	1-2 months	Exponential Growth Model	Minimum, maximum	Mean		0.84	2.26	y	y	y	y	NA	y	y	y	y	8
65	144	Cosimo Distante et al.	Italy	Covid-19 outbreak progression in italian regions: Approaching the peak by the end of march in northern Italy and first week of april in southern Italy	International Journal of Environmental Research and Public Health	2020-04-27	Italy	Sicily		Europe	2020-01-31	2020-03-29	1-2 months	Exponential Growth Model	Minimum, maximum	Mean		1.45	2.22	y	y	y	y	NA	y	y	y	y	8
65	144	Cosimo Distante et al.	Italy	Covid-19 outbreak progression in italian regions: Approaching the peak by the end of march in northern Italy and first week of april in southern Italy	International Journal of Environmental Research and Public Health	2020-04-27	Italy	Lombardy		Europe	2020-01-31	2020-03-29	1-2 months	Exponential Growth Model		Mean	3.6			y	y	y	y	NA	y	y	y	y	8
65	144	Cosimo Distante et al.	Italy	Covid-19 outbreak progression in italian regions: Approaching the peak by the end of march in northern Italy and first week of april in southern Italy	International Journal of Environmental Research and Public Health	2020-04-27	Italy	Piedmont		Europe	2020-01-31	2020-03-29	1-2 months	Exponential Growth Model		Mean	3.4			y	y	y	y	NA	y	y	y	y	8
65	144	Cosimo Distante et al.	Italy	Covid-19 outbreak progression in italian regions: Approaching the peak by the end of march in northern Italy and first week of april in southern Italy	International Journal of Environmental Research and Public Health	2020-04-27	Italy	Emilia Romagna		Europe	2020-01-31	2020-03-29	1-2 months	Exponential Growth Model	Minimum, maximum	Mean		2.68	3.26	y	y	y	y	NA	y	y	y	y	8
65	144	Cosimo Distante et al.	Italy	Covid-19 outbreak progression in italian regions: Approaching the peak by the end of march in northern Italy and first week of april in southern Italy	International Journal of Environmental Research and Public Health	2020-04-27	Italy	Tuscany		Europe	2020-01-31	2020-03-29	1-2 months	Exponential Growth Model	Minimum, maximum	Mean		2.11	2.84	y	y	y	y	NA	y	y	y	y	8
65	144	Cosimo Distante et al.	Italy	Covid-19 outbreak progression in italian regions: Approaching the peak by the end of march in northern Italy and first week of april in southern Italy	International Journal of Environmental Research and Public Health	2020-04-27	Italy	Marche		Europe	2020-01-31	2020-03-29	1-2 months	Exponential Growth Model	Minimum, maximum	Mean		1.96	2.65	y	y	y	y	NA	y	y	y	y	8
65	144	Cosimo Distante et al.	Italy	Covid-19 outbreak progression in italian regions: Approaching the peak by the end of march in northern Italy and first week of april in southern Italy	International Journal of Environmental Research and Public Health	2020-04-27	Italy	Fruili VG		Europe	2020-01-31	2020-03-29	1-2 months	Exponential Growth Model	Minimum, maximum	Mean		1.74	2.52	y	y	y	y	NA	y	y	y	y	8
65	144	Cosimo Distante et al.	Italy	Covid-19 outbreak progression in italian regions: Approaching the peak by the end of march in northern Italy and first week of april in southern Italy	International Journal of Environmental Research and Public Health	2020-04-27	Italy	PA Trento		Europe	2020-01-31	2020-03-29	1-2 months	Exponential Growth Model		Mean	3.23			y	y	y	y	NA	y	y	y	y	8
65	144	Cosimo Distante et al.	Italy	Covid-19 outbreak progression in italian regions: Approaching the peak by the end of march in northern Italy and first week of april in southern Italy	International Journal of Environmental Research and Public Health	2020-04-27	Italy	Marche		Europe	2020-01-31	2020-03-29	1-2 months	Exponential Growth Model		Mean	3.12			y	y	y	y	NA	y	y	y	y	8
65	144	Cosimo Distante et al.	Italy	Covid-19 outbreak progression in italian regions: Approaching the peak by the end of march in northern Italy and first week of april in southern Italy	International Journal of Environmental Research and Public Health	2020-04-27	Italy	Basilicata		Europe	2020-01-31	2020-03-29	1-2 months	Exponential Growth Model	Minimum, maximum	Mean		1.19	1.73	y	y	y	y	NA	y	y	y	y	8
65	144	Cosimo Distante et al.	Italy	Covid-19 outbreak progression in italian regions: Approaching the peak by the end of march in northern Italy and first week of april in southern Italy	International Journal of Environmental Research and Public Health	2020-04-27	Italy	Calabria		Europe	2020-01-31	2020-03-29	1-2 months	Exponential Growth Model		Mean	2.84			y	y	y	y	NA	y	y	y	y	8
65	144	Cosimo Distante et al.	Italy	Covid-19 outbreak progression in italian regions: Approaching the peak by the end of march in northern Italy and first week of april in southern Italy	International Journal of Environmental Research and Public Health	2020-04-27	Italy	Molise		Europe	2020-01-31	2020-03-29	1-2 months	Exponential Growth Model		Mean	2.6			y	y	y	y	NA	y	y	y	y	8
65	144	Cosimo Distante et al.	Italy	Covid-19 outbreak progression in italian regions: Approaching the peak by the end of march in northern Italy and first week of april in southern Italy	International Journal of Environmental Research and Public Health	2020-04-27	Italy	Abruzzo		Europe	2020-01-31	2020-03-29	1-2 months	Exponential Growth Model	Minimum, maximum	Mean		1.29	2.36	y	y	y	y	NA	y	y	y	y	8
65	144	Cosimo Distante et al.	Italy	Covid-19 outbreak progression in italian regions: Approaching the peak by the end of march in northern Italy and first week of april in southern Italy	International Journal of Environmental Research and Public Health	2020-04-27	Italy	Tuscany		Europe	2020-01-31	2020-03-29	1-2 months	Exponential Growth Model		Mean	3.25			y	y	y	y	NA	y	y	y	y	8
65	144	Cosimo Distante et al.	Italy	Covid-19 outbreak progression in italian regions: Approaching the peak by the end of march in northern Italy and first week of april in southern Italy	International Journal of Environmental Research and Public Health	2020-04-27	Italy	Sardinia		Europe	2020-01-31	2020-03-29	1-2 months	Exponential Growth Model	Minimum, maximum	Mean		1.42	2.12	y	y	y	y	NA	y	y	y	y	8
65	144	Cosimo Distante et al.	Italy	Covid-19 outbreak progression in italian regions: Approaching the peak by the end of march in northern Italy and first week of april in southern Italy	International Journal of Environmental Research and Public Health	2020-04-27	Italy	Lazio		Europe	2020-01-31	2020-03-29	1-2 months	Exponential Growth Model	Minimum, maximum	Mean		2.1	3.11	y	y	y	y	NA	y	y	y	y	8
65	144	Cosimo Distante et al.	Italy	Covid-19 outbreak progression in italian regions: Approaching the peak by the end of march in northern Italy and first week of april in southern Italy	International Journal of Environmental Research and Public Health	2020-04-27	Italy	Molise		Europe	2020-01-31	2020-03-29	1-2 months	Exponential Growth Model	Minimum, maximum	Mean		1.06	1.78	y	y	y	y	NA	y	y	y	y	8
65	144	Cosimo Distante et al.	Italy	Covid-19 outbreak progression in italian regions: Approaching the peak by the end of march in northern Italy and first week of april in southern Italy	International Journal of Environmental Research and Public Health	2020-04-27	Italy	Umbria		Europe	2020-01-31	2020-03-29	1-2 months	Exponential Growth Model		Mean	2.79			y	y	y	y	NA	y	y	y	y	8
65	144	Cosimo Distante et al.	Italy	Covid-19 outbreak progression in italian regions: Approaching the peak by the end of march in northern Italy and first week of april in southern Italy	International Journal of Environmental Research and Public Health	2020-04-27	Italy	Calabria		Europe	2020-01-31	2020-03-29	1-2 months	Exponential Growth Model	Minimum, maximum	Mean		0.99	2.02	y	y	y	y	NA	y	y	y	y	8
66	145	Xinmiao Rong et al.	China	Effect of delay in diagnosis on transmission of COVID-19	Mathematical Biosciences and Engineering	2020-03-11	China		Overall	Asia	2020-01-15	2020-03-05	1-2 months	Compartmental Model		Not specified	3.1021			y	y	y	y	NA	y	y	y	N	7
67	146	Ghada Nasr Radwan	Egypt	Epidemiology of sars-cov-2 in Egypt	Eastern Mediterranean Health Journal	2020-06-29	Egypt		Overall	Africa	2020-02-15	2020-03-14	2 weeks-1 month	Others		Mean	4.7			y	y	y	y	y	y	y	N	y	8
68	147	Joe Hilton et al.	UK	Estimation of country-level basic reproductive ratios for novel coronavirus (sars-cov-2/ covid-19) using synthetic contact matrices	PLoS Computational Biology	2020-07-02	Nepal		Overall	Asia				Others		Not specified	3.53			y	y	y	y	NA	y	NR	y	N	6
68	147	Joe Hilton et al.	UK	Estimation of country-level basic reproductive ratios for novel coronavirus (sars-cov-2/ covid-19) using synthetic contact matrices	PLoS Computational Biology	2020-07-02	Spain		Overall	Europe				Others		Not specified	2			y	y	y	y	NA	y	NR	y	N	6
68	147	Joe Hilton et al.	UK	Estimation of country-level basic reproductive ratios for novel coronavirus (sars-cov-2/ covid-19) using synthetic contact matrices	PLoS Computational Biology	2020-07-02	Belgium		Overall	Europe				Others		Not specified	1.95			y	y	y	y	NA	y	NR	y	N	6
68	147	Joe Hilton et al.	UK	Estimation of country-level basic reproductive ratios for novel coronavirus (sars-cov-2/ covid-19) using synthetic contact matrices	PLoS Computational Biology	2020-07-02	Italy		Overall	Europe				Others		Not specified	4.18			y	y	y	y	NA	y	NR	y	N	6
68	147	Joe Hilton et al.	UK	Estimation of country-level basic reproductive ratios for novel coronavirus (sars-cov-2/ covid-19) using synthetic contact matrices	PLoS Computational Biology	2020-07-02	Brazil		Overall	South America				Others		Not specified	2			y	y	y	y	NA	y	NR	y	N	6
68	147	Joe Hilton et al.	UK	Estimation of country-level basic reproductive ratios for novel coronavirus (sars-cov-2/ covid-19) using synthetic contact matrices	PLoS Computational Biology	2020-07-02	Iraq		Overall	Asia				Others		Not specified	1.79			y	y	y	y	NA	y	NR	y	N	6
68	147	Joe Hilton et al.	UK	Estimation of country-level basic reproductive ratios for novel coronavirus (sars-cov-2/ covid-19) using synthetic contact matrices	PLoS Computational Biology	2020-07-02	China		Overall	Asia				Others		Not specified	2.4			y	y	y	y	NA	y	NR	y	N	6
68	147	Joe Hilton et al.	UK	Estimation of country-level basic reproductive ratios for novel coronavirus (sars-cov-2/ covid-19) using synthetic contact matrices	PLoS Computational Biology	2020-07-02	Iraq		Overall	Asia				Others		Not specified	3.61			y	y	y	y	NA	y	NR	y	N	6
68	147	Joe Hilton et al.	UK	Estimation of country-level basic reproductive ratios for novel coronavirus (sars-cov-2/ covid-19) using synthetic contact matrices	PLoS Computational Biology	2020-07-02	Canada		Overall	North America				Others		Not specified	2.76			y	y	y	y	NA	y	NR	y	N	6
68	147	Joe Hilton et al.	UK	Estimation of country-level basic reproductive ratios for novel coronavirus (sars-cov-2/ covid-19) using synthetic contact matrices	PLoS Computational Biology	2020-07-02	Spain		Overall	Europe				Others		Not specified	2.79			y	y	y	y	NA	y	NR	y	N	6
68	147	Joe Hilton et al.	UK	Estimation of country-level basic reproductive ratios for novel coronavirus (sars-cov-2/ covid-19) using synthetic contact matrices	PLoS Computational Biology	2020-07-02	Austria		Overall	Europe				Others		Not specified	3.01			y	y	y	y	NA	y	NR	y	N	6
68	147	Joe Hilton et al.	UK	Estimation of country-level basic reproductive ratios for novel coronavirus (sars-cov-2/ covid-19) using synthetic contact matrices	PLoS Computational Biology	2020-07-02	Finland		Overall	Europe				Others		Not specified	3.64			y	y	y	y	NA	y	NR	y	N	6
68	147	Joe Hilton et al.	UK	Estimation of country-level basic reproductive ratios for novel coronavirus (sars-cov-2/ covid-19) using synthetic contact matrices	PLoS Computational Biology	2020-07-02	Canada		Overall	North America				Others		Not specified	2.17			y	y	y	y	NA	y	NR	y	N	6
68	147	Joe Hilton et al.	UK	Estimation of country-level basic reproductive ratios for novel coronavirus (sars-cov-2/ covid-19) using synthetic contact matrices	PLoS Computational Biology	2020-07-02	Ethiopia		Overall	Africa				Others		Not specified	2.06			y	y	y	y	NA	y	NR	y	N	6
68	147	Joe Hilton et al.	UK	Estimation of country-level basic reproductive ratios for novel coronavirus (sars-cov-2/ covid-19) using synthetic contact matrices	PLoS Computational Biology	2020-07-02	Japan		Overall	Asia				Others		Not specified	4.13			y	y	y	y	NA	y	NR	y	N	6
68	147	Joe Hilton et al.	UK	Estimation of country-level basic reproductive ratios for novel coronavirus (sars-cov-2/ covid-19) using synthetic contact matrices	PLoS Computational Biology	2020-07-02	Japan		Overall	Asia				Others		Not specified	1.89			y	y	y	y	NA	y	NR	y	N	6
68	147	Joe Hilton et al.	UK	Estimation of country-level basic reproductive ratios for novel coronavirus (sars-cov-2/ covid-19) using synthetic contact matrices	PLoS Computational Biology	2020-07-02	Italy		Overall	Europe				Others		Not specified	2.44			y	y	y	y	NA	y	NR	y	N	6
68	147	Joe Hilton et al.	UK	Estimation of country-level basic reproductive ratios for novel coronavirus (sars-cov-2/ covid-19) using synthetic contact matrices	PLoS Computational Biology	2020-07-02	Egypt		Overall	Africa				Others		Not specified	1.43			y	y	y	y	NA	y	NR	y	N	6
68	147	Joe Hilton et al.	UK	Estimation of country-level basic reproductive ratios for novel coronavirus (sars-cov-2/ covid-19) using synthetic contact matrices	PLoS Computational Biology	2020-07-02	Austria		Overall	Europe				Others		Not specified	2.29			y	y	y	y	NA	y	NR	y	N	6
68	147	Joe Hilton et al.	UK	Estimation of country-level basic reproductive ratios for novel coronavirus (sars-cov-2/ covid-19) using synthetic contact matrices	PLoS Computational Biology	2020-07-02	Ethiopia		Overall	Africa				Others		Not specified	4.02			y	y	y	y	NA	y	NR	y	N	6
68	147	Joe Hilton et al.	UK	Estimation of country-level basic reproductive ratios for novel coronavirus (sars-cov-2/ covid-19) using synthetic contact matrices	PLoS Computational Biology	2020-07-02	Belgium		Overall	Europe				Others		Not specified	3.6			y	y	y	y	NA	y	NR	y	N	6
68	147	Joe Hilton et al.	UK	Estimation of country-level basic reproductive ratios for novel coronavirus (sars-cov-2/ covid-19) using synthetic contact matrices	PLoS Computational Biology	2020-07-02	Nepal		Overall	Asia				Others		Not specified	2.18			y	y	y	y	NA	y	NR	y	N	6
68	147	Joe Hilton et al.	UK	Estimation of country-level basic reproductive ratios for novel coronavirus (sars-cov-2/ covid-19) using synthetic contact matrices	PLoS Computational Biology	2020-07-02	Egypt		Overall	Africa				Others		Not specified	3.17			y	y	y	y	NA	y	NR	y	N	6
68	147	Joe Hilton et al.	UK	Estimation of country-level basic reproductive ratios for novel coronavirus (sars-cov-2/ covid-19) using synthetic contact matrices	PLoS Computational Biology	2020-07-02	China		Overall	Asia				Others		Not specified	2.44			y	y	y	y	NA	y	NR	y	N	6
68	147	Joe Hilton et al.	UK	Estimation of country-level basic reproductive ratios for novel coronavirus (sars-cov-2/ covid-19) using synthetic contact matrices	PLoS Computational Biology	2020-07-02	Brazil		Overall	South America				Others		Not specified	2.79			y	y	y	y	NA	y	NR	y	N	6
68	147	Joe Hilton et al.	UK	Estimation of country-level basic reproductive ratios for novel coronavirus (sars-cov-2/ covid-19) using synthetic contact matrices	PLoS Computational Biology	2020-07-02	Finland		Overall	Europe				Others		Not specified	1.97			y	y	y	y	NA	y	NR	y	N	6
69	148	Patrick Bryant et al.	Sweden	Estimating the impact of mobility patterns on COVID-19 infection rates in 11 European countries	PeerJ	2020-09-15	Austria		Overall	Europe	2020-03-30	2020-04-19	2 weeks-1 month	Others		Not specified	3.11			y	y	y	y	NA	y	y	y	N	7
69	148	Patrick Bryant et al.	Sweden	Estimating the impact of mobility patterns on COVID-19 infection rates in 11 European countries	PeerJ	2020-09-15	Germany		Overall	Europe	2020-03-30	2020-04-19	2 weeks-1 month	Others		Not specified	3.08			y	y	y	y	NA	y	y	y	N	7
69	148	Patrick Bryant et al.	Sweden	Estimating the impact of mobility patterns on COVID-19 infection rates in 11 European countries	PeerJ	2020-09-15	Denmark		Overall	Europe	2020-03-30	2020-04-19	2 weeks-1 month	Others		Not specified	3.02			y	y	y	y	NA	y	y	y	N	7
69	148	Patrick Bryant et al.	Sweden	Estimating the impact of mobility patterns on COVID-19 infection rates in 11 European countries	PeerJ	2020-09-15	Spain		Overall	Europe	2020-03-30	2020-04-19	2 weeks-1 month	Others		Not specified	3.19			y	y	y	y	NA	y	y	y	N	7
69	148	Patrick Bryant et al.	Sweden	Estimating the impact of mobility patterns on COVID-19 infection rates in 11 European countries	PeerJ	2020-09-15	Belgium		Overall	Europe	2020-03-30	2020-04-19	2 weeks-1 month	Others		Not specified	3.24			y	y	y	y	NA	y	y	y	N	7
69	148	Patrick Bryant et al.	Sweden	Estimating the impact of mobility patterns on COVID-19 infection rates in 11 European countries	PeerJ	2020-09-15	France		Overall	Europe	2020-03-30	2020-04-19	2 weeks-1 month	Others		Not specified	2.91			y	y	y	y	NA	y	y	y	N	7
69	148	Patrick Bryant et al.	Sweden	Estimating the impact of mobility patterns on COVID-19 infection rates in 11 European countries	PeerJ	2020-09-15	Norway		Overall	Europe	2020-03-30	2020-04-19	2 weeks-1 month	Others		Not specified	2.82			y	y	y	y	NA	y	y	y	N	7
69	148	Patrick Bryant et al.	Sweden	Estimating the impact of mobility patterns on COVID-19 infection rates in 11 European countries	PeerJ	2020-09-15	Italy		Overall	Europe	2020-03-30	2020-04-19	2 weeks-1 month	Others		Not specified	3.17			y	y	y	y	NA	y	y	y	N	7
69	148	Patrick Bryant et al.	Sweden	Estimating the impact of mobility patterns on COVID-19 infection rates in 11 European countries	PeerJ	2020-09-15	UK		Overall	Europe	2020-03-30	2020-04-19	2 weeks-1 month	Others		Not specified	2.82			y	y	y	y	NA	y	y	y	N	7
69	148	Patrick Bryant et al.	Sweden	Estimating the impact of mobility patterns on COVID-19 infection rates in 11 European countries	PeerJ	2020-09-15	Sweden		Overall	Europe	2020-03-30	2020-04-19	2 weeks-1 month	Others		Not specified	2.89			y	y	y	y	NA	y	y	y	N	7
69	148	Patrick Bryant et al.	Sweden	Estimating the impact of mobility patterns on COVID-19 infection rates in 11 European countries	PeerJ	2020-09-15	Switzerland		Overall	Europe	2020-03-30	2020-04-19	2 weeks-1 month	Others		Not specified	2.81			y	y	y	y	NA	y	y	y	N	7
70	149	M. Liu et al.	China	Modelling the evolution trajectory of COVID-19 in Wuhan, China: experience and suggestions	Public Health	2020-05-12	China		Overall	Asia	2019-12-07	2020-01-10	1-2 months	Compartmental Model		Not specified	2.343			y	y	y	y	NA	y	y	y	N	7
70	149	M. Liu et al.	China	Modelling the evolution trajectory of COVID-19 in Wuhan, China: experience and suggestions	Public Health	2020-05-12	China		Overall	Asia	2019-12-07	2020-01-23	1-2 months	Compartmental Model		Not specified	2.827			y	y	y	y	NA	y	y	y	N	7
71	150	Elena Loli Piccolomini at al.	Italy	Monitoring Italian COVID-19 spread by a forced SEIRD model	PLoS ONE	2020-08-06	Italy		Overall	Europe	2020-02-24	2020-05-24	> 2 months	Compartmental Model		Not specified	6.6			y	y	y	y	NA	y	y	y	N	7
72	151	Haifa Ben Fredj et al.	Tunisia	Novel Corona virus disease infection in Tunisia: Mathematical model and the impact of the quarantine strategy	Chaos, Solitons and Fractals	2020-06-10	Tunisia		Overall	Africa	2020-03-14	2020-04-08	2 weeks-1 month	Compartmental Model		Not specified	7.5			y	y	y	y	NA	y	y	y	N	7
73	152	Bernd Blasius	Germany	Power-law distribution in the number of confirmed COVID-19 cases	Chaos	2020-09-14	Countries worldwide and counties in the US		Overall		2020-01-22	2020-04-05	> 2 months	Others		Not specified	2.4			y	y	y	y	NA	y	y	y	N	7
74	153	Muhammad Altaf Khan a et al.	South Africa, Taiwan	Modeling the dynamics of novel coronavirus (2019-nCov) with fractional derivative	Alexandria Engineering Journal	2020-03-14	China	Wuhan	Wuhan	Asia	2020-01-21	2020-01-28	<= 2 weeks	Compartmental Model		Not specified	2.4829			y	y	y	y	NA	y	N	y	N	6
75	154	Qiangsheng Huang et al.	China, US	Mathematical modeling of COVID-19 control and prevention based on immigration population data in China: Model development and validation	JMIR Public Health and Surveillance	2020-05-25	China	Shanghai	Outside Hubei	Asia	2020-01-21	2020-02-11	2 weeks-1 month	Others		Not specified	0.46			y	y	y	y	NA	y	y	y	N	7
75	154	Qiangsheng Huang et al.	China, US	Mathematical modeling of COVID-19 control and prevention based on immigration population data in China: Model development and validation	JMIR Public Health and Surveillance	2020-05-25	China	Anhu	Outside Hubei	Asia	2020-01-21	2020-02-11	2 weeks-1 month	Others		Not specified	0.98			y	y	y	y	NA	y	y	y	N	7
75	154	Qiangsheng Huang et al.	China, US	Mathematical modeling of COVID-19 control and prevention based on immigration population data in China: Model development and validation	JMIR Public Health and Surveillance	2020-05-25	China	Zhejiang	Outside Hubei	Asia	2020-01-21	2020-02-11	2 weeks-1 month	Others		Not specified	0.52			y	y	y	y	NA	y	y	y	N	7
75	154	Qiangsheng Huang et al.	China, US	Mathematical modeling of COVID-19 control and prevention based on immigration population data in China: Model development and validation	JMIR Public Health and Surveillance	2020-05-25	China	Sichuan	Outside Hubei	Asia	2020-01-21	2020-02-11	2 weeks-1 month	Others		Not specified	0.8			y	y	y	y	NA	y	y	y	N	7
75	154	Qiangsheng Huang et al.	China, US	Mathematical modeling of COVID-19 control and prevention based on immigration population data in China: Model development and validation	JMIR Public Health and Surveillance	2020-05-25	China	Henan	Outside Hubei	Asia	2020-01-21	2020-02-11	2 weeks-1 month	Others		Not specified	0.75			y	y	y	y	NA	y	y	y	N	7
75	154	Qiangsheng Huang et al.	China, US	Mathematical modeling of COVID-19 control and prevention based on immigration population data in China: Model development and validation	JMIR Public Health and Surveillance	2020-05-25	China	Jiangsu	Outside Hubei	Asia	2020-01-21	2020-02-11	2 weeks-1 month	Others		Not specified	0.82			y	y	y	y	NA	y	y	y	N	7
76	155	Mohammed Al Zobbi et al.	Australia	Measurement method for evaluating the lockdown policies during the COVID-19 pandemic	International Journal of Environmental Research and Public Health	2020-08-02	South Korea		Overall	Asia	2020-02-15	2020-04-11	1-2 months	Others		Mean	0.6			y	y	y	y	y	y	y	N	y	8
